# Spatial Confidence Sets for Raw Effect Size Images

Alexander Bowring<sup>1</sup>, Fabian Telschow<sup>2</sup>, Armin Schwartzman<sup>2,3</sup>, Thomas E. Nichols<sup>1,4,5</sup>

<sup>1</sup>*Big Data Institute, Li Ka Shing Centre for Health Information and Discovery, Nuffield Department of Population Health, University of Oxford, Oxford, UK*

<sup>2</sup>*Division of Biostatistics, University of California, San Diego, California, USA*

<sup>3</sup>*Halicioğlu Data Science Institute, University of California, San Diego*

<sup>4</sup>*Wellcome Centre for Integrative Neuroimaging, FMRIB, Nuffield Department of Clinical Neurosciences, University of Oxford, Oxford, UK*

<sup>5</sup>*Department of Statistics, University of Warwick, Coventry, UK*

---

## Abstract

The mass-univariate approach for functional magnetic resonance imagery (fMRI) analysis remains a widely used and fundamental statistical tool within neuroimaging. However, this method suffers from at least two fundamental limitations: First, with sample sizes growing to 4, 5 or even 6 digits, the entire approach is undermined by the null hypothesis fallacy, i.e. with sufficient sample size, there is high enough statistical power to reject the null hypothesis everywhere, making it difficult if not impossible to localize effects of interest. Second, with any sample size, when cluster-size inference is used a significant  $p$ -value only indicates that a cluster is larger than chance, and no notion of spatial uncertainty is provided. Therefore, no perception of confidence is available to express the size or location of a cluster that could be expected with repeated sampling from the population.

In this work, we address these issues by extending on a method proposed by *Sommerfeld, Sain, and Schwartzman (2018)* to develop spatial Confidence Sets (CSs) on clusters found in thresholded raw effect size maps. While hypothesis testing indicates where the null, i.e. a raw effect size of zero, can be rejected, the CSs give statements on the locations where raw effect sizes exceed, and fall short of, a *non-zero* threshold, providing both an upper and lower CS.

While the method can be applied to any parameter in a mass-univariate General Linear Model, we motivate the method in the context of BOLD fMRI contrast maps for inference on percentage

BOLD change raw effects. We propose several theoretical and practical implementation advancements to the original method in order to deliver an improved performance in small-sample settings. We validate the method with 3D Monte Carlo simulations that resemble fMRI data. Finally, we compute CSs for the Human Connectome Project working memory task contrast images, illustrating the brain regions that show a reliable %BOLD change for a given %BOLD threshold.

---

## 1. Introduction

Over the last three decades, the Statistical Parametric Mapping procedure (Friston et al., 1994a) for inference of task-fMRI data has prevailed as the international standard within the field of neuroimaging. Incorporating a mass-univariate statistical approach, functional data at each voxel is described in terms of experimental conditions and residual variability included as parameters in a general linear model. From this model, a group-level Statistical Parametric Map (SPM) of  $t$ -statistic's contrasting a specified experimental condition relative to a baseline condition is formed. Using a corrected significance level based on the theory of random fields to account for the multiple-comparison problem (Friston et al., 1994b), hypotheses are tested at each voxel independently and the SPM is finally thresholded to localize brain function. While simple by nature, this technique has proven immensely powerful and provided us with the tools to gain deep insight into cognitive function.

There is, however, information that *is not* captured using the current fMRI approach to inference. Specifically, for clusterwise inference, the cluster-level  $p$ -value only conveys information about a cluster's spatial extent under the null-hypothesis. Since no information is provided regarding the statistical significance of each voxel comprising a significant cluster, the most we can say is that significant activation has occurred *somewhere* inside the cluster (Woo et al., 2014). An implication of this is that when a large, sprawling cluster covers many anatomical regions, the precise spatial specificity of the activation is in fact poor. While a recent effort has attempted to solve this problem by 'drilling down' to find the exact source of activation (Rosenblatt et al., 2018), this can come at the cost of lower statistical power. A related problem of cluster inference is that no information is provided about the spatial variation of significant clusters. For example, if a given fMRI study were to be repeated many times with new sets of subjects, there would of course be

variation in the size and shape of clusters found, yet the current statistical results have no way to  
25 characterize this variability.

A more pressing issue, perhaps, stems from an age-old paradox caused by the ‘fallacy of the  
null hypothesis’ (Rozeboom, 1960). The paradox is that while statistical models conventionally  
assume mean-zero noise, in reality all sources of noise will *never* cancel, and therefore improve-  
ments in experimental design will eventually lead to statistically significant results. Thus, the null-  
30 hypothesis will, eventually, *always* be rejected (Meehl, 1967). The recent availability of ambitious,  
large-sample studies (e.g Human Connectome Project (HCP), N=1,200; UK Biobank, N=30,000  
and counting) have exemplified this problem. Analysis of high-quality fMRI data acquired under  
optimal noise conditions has been shown to display almost universal activation across the entire  
brain after hypothesis testing, even with stringent correction (Gonzalez-Castillo et al., 2012).

35 For the reasons discussed above, alongside further concerns about misconceptions and the  
misuse of *p*-values in statistical testing (Nuzzo, 2014, Wasserstein et al., 2016), there has been  
a growing consensus among sections of the neuroimaging community that the statistical results  
commonly reported in the literature should be supplemented by effect estimates (Chen et al.,  
2017, Nichols et al., 2017). The main argument put forward supporting raw effect sizes is that  
40 they increase interpretability of the statistical results, highlighting the magnitude of statistically  
significant differences and providing another layer of evidence to support the overall scientific  
conclusions inferred from an fMRI study. This may also help tackle reproducibility concerns that  
have become prominent within the field due to failed attempts in replicating published neuroimag-  
ing results based off of statistical testing methods (Poldrack et al., 2017).

45 In this work, we seek to address all of these issues by applying and extending a spatial inference  
method initially proposed by *Sommerfeld, Sain, and Schwartzman (2018) (SSS)* to obtain precise  
confidence statements about where activation occurs in the brain. Unlike hypothesis testing, our  
spatial Confidence Sets (CSs) allow for inference on *non-zero* raw effect sizes. While the method  
can be applied to any parameter in a mass-univariate General Linear Model, here we will focus  
50 inference on the mean percentage BOLD change raw effect. For a cluster-forming threshold  $c$ , and  
a predetermined confidence level  $1 - \alpha$ , the CSs comprise of two sets: the upper CS (denoted  $\hat{\mathcal{A}}_c^+$ ,  
red voxels in **Fig. 1**), giving all voxels we can assert have a percentage BOLD raw effect size truly

greater than  $c$ ; and the lower CS ( $\hat{\mathcal{A}}_c^-$ , blue voxels overlapped by yellow and red in **Fig. 1**), for which all voxels *outside* this set we can assert have a percentage BOLD raw effect size truly *less* than  $c$ . The upper CS is smaller and nested inside the lower CS, and the assertion is made with  $(1 - \alpha)100\%$  confidence holding simultaneously for both regions. **Fig. 1** provides an illustration of the schematic we will use to display the CSs, also showing the point estimate set ( $\hat{\mathcal{A}}_c$ , yellow voxels overlapped by red) obtained by thresholding the data at  $c$ .

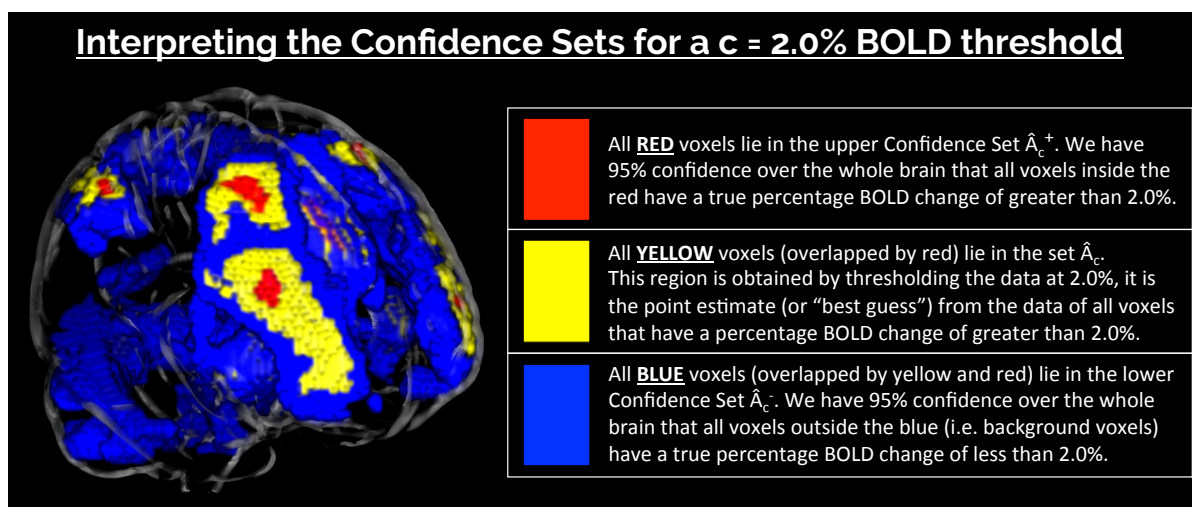

**Figure 1:** Schematic of the colour-coded regions used to visually represent the Confidence Sets (CSs) and point estimate set. CSs displayed in the glass brain were obtained by applying the method to 80 participants contrast data from the Human Connectome Project working memory task, using a  $c = 2.0\%$  BOLD change threshold at a confidence level of  $1 - \alpha = 95\%$ .

With this interpretation, the CSs can be linked to traditional statistical voxelwise thresholding with control of the familywise error rate (FWE): In a one-sided  $t$ -test, for the set of level  $\alpha$  FWE-significant voxels we have  $(1 - \alpha)100\%$  confidence that the signal is greater than zero. Put another way, we have  $(1 - \alpha)100\%$  confidence that the voxelwise level  $\alpha$  FWE results are all true positives. The CSs can be viewed as a generalisation of these methods, except that the confidence statement is no longer relative to a signal of zero, but to a non-zero signal magnitude  $c$ . Users may choose the threshold  $c$  based on prior knowledge of raw effect sizes reported in previous similar studies to their own; since computation of the CSs is quick, users may also report results for a variety of cluster-forming thresholds as we do in this work.

The motivating data in *SSS* were longitudinal temperature data in North America, and the goal was to infer on areas at risk of climate change. In this work, we are motivated by subject-level  
70 fMRI contrast of a parameter estimate maps, and we seek to infer brain areas where a substantial raw effect is present in units of percentage BOLD change. In *SSS*, the CSs were referred to as ‘Coverage Probability Excursion sets’ – shortened to ‘CoPE sets.’

The main contributions of this work are modifications to the *SSS* method for computing CSs that improve the method’s finite-sample performance in the context of neuroimaging. In particular,  
75 we propose a combination of the Wild *t*-Bootstrap method and the use of Rademacher variables (instead of Gaussian variables) for multiplication of the bootstrapped residuals, which we find substantially improves performance of the method in moderate sample sizes (e.g.  $N = 60$ ). We also develop a linear interpolation method for computing the boundary over which the bootstrap is applied, and a novel approach for assessing the empirical coverage of the CSs that reduces upward  
80 bias in how the simulation results are measured. Another contribution here is that we assess the finite-sample accuracy of the method on synthetic 3D signals that are representative of fMRI activation clusters, whereas *SSS* only considered 2D images. Altogether, we carry out a range of 3D simulations alongside smaller 2D simulations to evaluate our proposed methodological modifications and compare our results to the simulations conducted in *SSS*. Finally, we apply the method  
85 to the Human Connectome Project working memory task dataset, operating on the subject-level percentage BOLD change raw effect maps, where we obtain CSs for a variety of cluster-forming thresholds. Here, the method localizes brain activation in cognitive regions commonly associated to working memory, determining with 95% confidence a raw effect of at least 2% BOLD change.

The remainder of this paper is organized as follows. First of all, we summarize the key theory  
90 of CSs before detailing our proposed modifications. We then describe the settings used for our simulations, and provide background information about the HCP dataset analyzed in this work. Finally, we report the results of our simulations before presenting the CSs computed for the HCP data.

## 2. Theory

### 95 2.1. Overview

A comprehensive treatment of the original method, including proofs, can be found in SSS. Here we develop the method specifically for the general linear model (GLM) and describe our own enhancements to the method. While the method can be performed for subject-level inference, we will motivate the method in the context of a group-level analysis, describing how the method  
100 can be applied to subject-level %BOLD estimate maps in order to obtain group-level CSs making confidence statements about %BOLD effect sizes relating to the entire population from which the participants were drawn.

For a compact domain  $S \subset \mathbb{R}^D$ , e.g.  $D = 3$ , consider the GLM at location  $s \in S$ ,

$$Y(s) = X\beta(s) + \epsilon(s) \quad (1)$$

where  $Y(s)$  is an  $N \times 1$  vector of observations at  $s$ ,  $X$  is an  $N \times p$  design matrix,  $\beta(s)$  is an  
105  $p \times 1$  vector of unknown coefficients, and  $\epsilon(s)$  an  $N \times 1$  vector of mean-zero errors, independent over observations, and with each  $\epsilon_i$  having common variance  $\sigma^2(s)$  and some unspecified spatial correlation. (Throughout we use boldface to indicate a vector- or matrix-valued variable.) In the context of a task-fMRI analysis,  $Y(s)$  is a vector of subject-level %BOLD response estimate maps obtained by applying a first-level GLM to each of the  $N$  participants functional data.

110 For a  $p \times 1$  contrast vector  $w$ , we seek to infer regions of the brain where a contrast of interest  $w^T\beta$  has exceeded a fixed threshold  $c$ . Particularly, we are interested in the noise-free, population cluster defined as:

$$\mathcal{A}_c = \{s \in S : w^T\beta(s) \geq c\}. \quad (2)$$

Since we are unable to determine this excursion set in practice, our solution is to find spatial CSs: an upper set  $\hat{\mathcal{A}}_c^+$  and lower set  $\hat{\mathcal{A}}_c^-$  that surround  $\mathcal{A}_c$  for a desired confidence level of, for  
115 example, 95%. We emphasize that these clusters regard the raw units of the signal. Going forward, we assume that the design matrix  $X$  and contrast  $w$  have been carefully chosen so that  $w^T\hat{\beta}$  has the interpretation of mean %BOLD change across the group. For example, in a one-sample group fMRI model where data  $Y$  have %BOLD units, choosing  $X$  as a column of 1's and  $w = (1)$  would

ensure that  $\mathbf{w}^T \hat{\boldsymbol{\beta}}$  has units of %BOLD change<sup>1</sup>. In this setting, we wish to obtain an upper CS,  $\hat{\mathcal{A}}_c^+$ ,  
 120 such that we have 95% confidence all voxels *contained* in this set have a population raw effect size  
*greater* than, for example,  $c = 2.0\%$  BOLD change, and a lower CS,  $\hat{\mathcal{A}}_c^-$ , such that we have 95%  
 confidence all voxels *outside* of this set have a population raw effect size *less* than 2.0% BOLD  
 change. Moreover, we desire that the 95% confidence statement holds simultaneously across both  
 CSs at once. SSS show that a construction of such CSs is possible within the general linear model  
 125 framework using the following key result.

**Result 1.** Consider the general linear model setup described in (1). Let  $\hat{\boldsymbol{\beta}}$  denote the ordinary  
 least squares estimator of  $\boldsymbol{\beta}$ ,  $\hat{\boldsymbol{\beta}}(s) = (\mathbf{X}^T \mathbf{X})^{-1} \mathbf{X}^T \mathbf{Y}(s)$ , and define  $v_w^2 = \mathbf{w}^T (\mathbf{X}^T \mathbf{X})^{-1} \mathbf{w}$  to be the  
 normalised variance of the contrast estimate.

Then for a constant  $k$ , and for upper and lower CSs defined as

$$\hat{\mathcal{A}}_c^+ := \left\{ s : \mathbf{w}^T \hat{\boldsymbol{\beta}}(s) \geq c + k \hat{\sigma}(s) v_w \right\}, \quad \hat{\mathcal{A}}_c^- := \left\{ s : \mathbf{w}^T \hat{\boldsymbol{\beta}}(s) \geq c - k \hat{\sigma}(s) v_w \right\},$$

the limiting coverage of the CSs is

$$\lim_{n \rightarrow \infty} P \left[ \hat{\mathcal{A}}_c^+ \subset \mathcal{A}_c \subset \hat{\mathcal{A}}_c^- \right] = P \left[ \sup_{s \in \partial \mathcal{A}_c} |G(s)| \leq k \right],$$

where  $\partial \mathcal{A}_c$  denotes the boundary of  $\mathcal{A}_c$ , and  $G$  is a smooth Gaussian field on  $S$  with mean zero,  
 130 unit variance, and with the same spatial correlation as each  $\epsilon_i$ .

Result 1 is subject to continuity of the relevant fields and some basic conditions on the increments  
 and moments of the error field  $\boldsymbol{\epsilon}$ . A list of these assumptions, as well as a proof of Result 1, are  
 itemized in SSS.

For a pre-determined confidence level  $1 - \alpha$  (e.g.  $1 - \alpha = 95\%$ ), by choosing  $k$  such that

$$P \left[ \sup_{s \in \partial \mathcal{A}_c} |G(s)| \leq k \right] \geq 1 - \alpha, \quad (3)$$

135 Result 1 ensures with asymptotic probability of  $1 - \alpha$  that  $\hat{\mathcal{A}}_c^-$  contains the true  $\mathcal{A}_c$ , and  $\hat{\mathcal{A}}_c^+$  is  
 contained within  $\mathcal{A}_c$ . In practice,  $k$  is determined as the  $(1 - \alpha)100$  percentile of the maximum

---

<sup>1</sup>For examples of how to set up more complex designs and contrasts, see Figure A.2. in the Appendix A section  
 of (Poldrack et al., 2011).

distribution of the asymptotic absolute error process  $|G(s)|$  over the true boundary set  $\partial\mathcal{A}_c = \{s : \mathbf{w}^T\boldsymbol{\beta}(s) = c\}$ . The upper CS taken away from the lower CS  $(\hat{\mathcal{A}}_c^- \cap (\hat{\mathcal{A}}_c^+)^c)$  can be interpreted analogously to a standard confidence interval: with a confidence of  $1 - \alpha$ , we can assert the true boundary  $\partial\mathcal{A}_c$  lies within this region. Here, we allude to the classical frequentist interpretation of confidence, where stated precisely, there is a probability of  $1 - \alpha$  that the region  $(\hat{\mathcal{A}}_c^- \cap (\hat{\mathcal{A}}_c^+)^c)$  computed from a future experiment fully encompasses the true set boundary  $\partial\mathcal{A}_c$ .

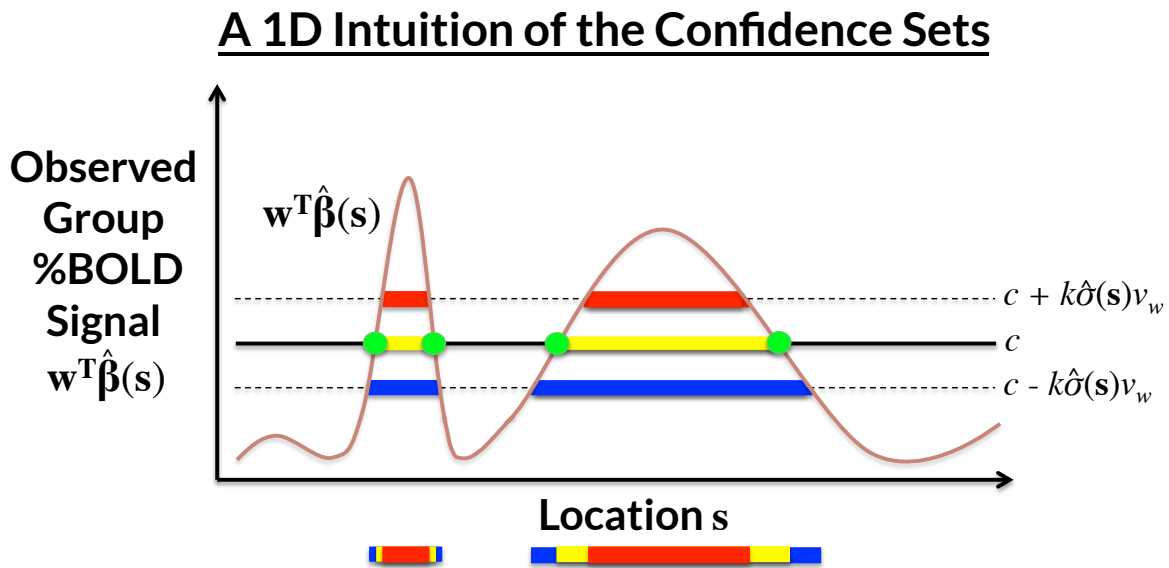

**Figure 2:** A demonstration of how the CSs are computed for a realization of the GLM  $Y(s) = X\boldsymbol{\beta}(s) + \boldsymbol{\epsilon}(s)$  in 1 dimension, for each location  $s$ . The yellow voxels  $\hat{\mathcal{A}}_c$  are obtained by thresholding the observed group contrast map at threshold  $c$ ; this is the best guess of  $\mathcal{A}_c$ , the set of voxels whose true, noise-free raw effect surpasses  $c$ . The red upper CS  $\hat{\mathcal{A}}_c^+$  and blue lower CS  $\hat{\mathcal{A}}_c^-$  are computed by thresholding the signal at  $c + k\hat{\sigma}(s)v_w$  and  $c - k\hat{\sigma}(s)v_w$ , respectively. We have  $(1 - \alpha)100\%$  confidence that  $\hat{\mathcal{A}}_c^+ \subset \mathcal{A}_c \subset \hat{\mathcal{A}}_c^-$ , i.e. that  $\hat{\mathcal{A}}_c^+$  (red) is completely within the true  $\mathcal{A}_c$ , and  $\mathcal{A}_c$  is completely within  $\hat{\mathcal{A}}_c^-$  (blue). We find the critical value  $k$  from the  $(1 - \alpha)100$  percentile of the maximum distribution of the absolute error process over the estimated boundary  $\partial\hat{\mathcal{A}}_c$  (green ●'s) using the Wild  $t$ -Bootstrap;  $\hat{\sigma}$  is the estimated standard deviation and  $v_w$  is the normalised contrast variance.

Application of Result 1 presents us with two challenges: that the boundary set  $\partial\mathcal{A}_c$  and the



critical value  $k$  are both unknown. To solve the first problem, SSS propose using  $\partial\hat{\mathcal{A}}_c$  as a plug-in  
 145 estimate of  $\partial\mathcal{A}_c$ . There remain, however, technicalities at to how the boundary is determined in  
 any non-abstract setting, and in particular in a 3D image. In Section 2.3 we propose our own novel  
 method for boundary estimation. Before that, we address the second problem, finding the critical  
 value  $k$  via a Wild Bootstrap resampling scheme.

## 2.2. The Wild $t$ -Bootstrap Method for Computation of $k$

150 To apply Result 1, we require knowledge of the tail distribution of the limiting Gaussian field  $G$   
 along the boundary  $\partial\mathcal{A}_c$ . However, the distribution of this field is unknown, because it is dependent  
 on the unknown spatial correlation of the errors  $\epsilon_i$ . We can approximate the maximum distribution  
 of  $G$  using the Gaussian Wild Bootstrap (Chernozhukov et al., 2013), also known as the Gaussian  
 Multiplier Bootstrap, which multiplies residuals by random values to create surrogate instances of  
 155 the random errors.

SSS construct  $G$  as follows: The standardized residuals,

$$\tilde{\epsilon}(\mathbf{s}) = \frac{Y(\mathbf{s}) - X\hat{\beta}(\mathbf{s})}{\sigma(\mathbf{s})}, \quad (4)$$

are multiplied by i.i.d. Gaussian random variables,  $r_1^*, \dots, r_N^*$ , summed and scaled,

$$G^*(\mathbf{s}) = \frac{1}{\sqrt{N}} \sum_{i=1}^N r_i^* \tilde{\epsilon}_i(\mathbf{s}), \quad (5)$$

producing a field  $G^*$  with approximately the same covariance as each error  $\epsilon_i$ , where the superscript  
 asterisk (\*) indicates these are just one of many bootstrap realizations. With  $B$  bootstrap samples  
 160  $G^*$ , we choose  $k$  as the  $(1 - \alpha)100$  percentile of the  $B$  suprema  $\sup_{\mathbf{s} \in \partial\hat{\mathcal{A}}_c} |G^*(\mathbf{s})|$  to approximate the  
 LHS of (3) and apply Result 1 to obtain the CSs.

Up to this point, we have summarized the Gaussian Wild Bootstrap methodology as proposed  
 in SSS. However, when applying this method to our own simulations, we consistently found that  
 our coverage results fell below the nominal level. This was particularly severe for 3D simula-  
 165 tions we conducted using a small sample size ( $N = 60$ ), where our results in some cases suffered  
 from under-coverage 40% or more below the nominal level (see **Fig. 6.2**). Hence we made two  
 alterations: First, while SSS used Gaussian multipliers, we found improved performance using

Rademacher variables, where each  $r_i$  takes on 1 or -1 with probability 1/2; others have also reported improved performance with Rademacher variables as well (Davidson and Flachaire, 2008).  
170 Second, we implemented a Wild  $t$ -Bootstrap (Telschow and Schwartzman, 2019) method, normalizing the bootstrapped residuals  $\tilde{\epsilon}_i(\mathbf{s})$  by their standard deviation  $\hat{\sigma}^*$ . This detail was omitted in the proof of Result 1 provided in SSS, where the true standard deviation was assumed to be known. By taking into account the estimation of the standard deviation via the Wild  $t$ -Bootstrap, we found improved performance for moderate sample sizes. The Wild  $t$ -Bootstrap version of  $G$  is

$$\tilde{G}^*(\mathbf{s}) = \frac{1}{\sqrt{N}} \sum_{i=1}^N r_i^* \frac{\tilde{\epsilon}_i(\mathbf{s})}{\hat{\sigma}^*(\mathbf{s})}, \quad (6)$$

175 where  $\hat{\sigma}^*(\mathbf{s})$  is the standard deviation of the present realization of the bootstrapped residuals  $r_i^* \tilde{\epsilon}_i(\mathbf{s})$ . We then determine  $k$  as described above but using  $\tilde{G}^*$  instead of  $G^*$ . Going forward, we refer to this method as the “Wild  $t$ -Bootstrap”, to be contrasted with the original “Gaussian Wild Bootstrap” method proposed in SSS.

With these two alterations we found a dramatic increase in performance for small sample sizes  
180 in 3D simulations. Notably, in contrast to the Gaussian Wild Bootstrap, our simulation results presented in Section 4 suggest that empirical coverage rates for this modified procedure remain valid, i.e. stay *above* the nominal level.

### 2.3. Approximating the Boundary on a Discrete Lattice

In the previous section, we described the ideal bootstrap procedure used to obtain the maximum  
185 distribution of  $G$  along the boundary  $\partial\mathcal{A}_c$  in order to apply Result 1. However, in any practical application, data will be observed on a discrete grid of lattice points at a fixed resolution. Therefore, a key challenge is how to appropriately approximate the true continuous boundary  $\partial\mathcal{A}_c$  from the lattice representation of the data.

In SSS, spline-interpolation was used to estimate a 1D boundary at a resolution greater than  
190 their 2D sampled field (SSS, Section 4.1). However, to apply the method to fMRI data we will work with 3D images, and estimating a 2D spline boundary for a 3D field is more involved, requiring careful tuning of the spline basis to accommodate the structure of the 3D signal. Instead, we choose to use a first-order weighted linear interpolation method to approximate the signal values

at estimated locations along the true, continuous boundary  $\partial\mathcal{A}_c$ , providing a method of boundary  
 195 estimation that is less computationally intensive than spline interpolation.

Consider two adjacent points on the lattice,  $s_O$  and  $s_I$ , such that  $s_O$  lies outside of  $\mathcal{A}_c$ , while  
 $s_I$  lies inside  $\mathcal{A}_c$ . By the definition of  $\mathcal{A}_c$ ,  $\mathbf{w}^T\boldsymbol{\beta}(s_O) < c$ , and  $\mathbf{w}^T\boldsymbol{\beta}(s_I) \geq c$ . Under the assumption  
 that the component of the signal between  $s_O$  and  $s_I$  increases linearly, we can find the location  $s^*$   
 between  $s_O$  and  $s_I$  such that  $\mathbf{w}^T\boldsymbol{\beta}(s^*) = c$ , our estimate of where the true continuous boundary  $\partial\mathcal{A}_c$   
 200 crosses between  $s_O$  and  $s_I$ . We can then construct a linear interpolant for the location  $s^*$ , using  
 weights

$$m_1 = \frac{\mathbf{w}^T\boldsymbol{\beta}(s_I) - c}{\mathbf{w}^T\boldsymbol{\beta}(s_I) - \mathbf{w}^T\boldsymbol{\beta}(s_O)}, \quad m_2 = \frac{c - \mathbf{w}^T\boldsymbol{\beta}(s_O)}{\mathbf{w}^T\boldsymbol{\beta}(s_I) - \mathbf{w}^T\boldsymbol{\beta}(s_O)}, \quad (7)$$

for locations  $s_O$  and  $s_I$ , respectively. By construction, applying  $m_1$  and  $m_2$  to the contrast image  
 returns the threshold:  $m_1\mathbf{w}^T\boldsymbol{\beta}(s_O) + m_2\mathbf{w}^T\boldsymbol{\beta}(s_I) = \mathbf{w}^T\boldsymbol{\beta}(s^*) = c$ . Applied to standardized residuals  
 $\tilde{\boldsymbol{\epsilon}}(s_O)$  and  $\tilde{\boldsymbol{\epsilon}}(s_I)$ , we can likewise obtain the residuals at the estimated continuous boundary point  
 205  $\tilde{\boldsymbol{\epsilon}}(s^*) = m_1\tilde{\boldsymbol{\epsilon}}(s_O) + m_2\tilde{\boldsymbol{\epsilon}}(s_I)$ .

By repeating this procedure for all adjacent points  $s_O$  and  $s_I$  that lie on the lattice either side  
 of  $\partial\mathcal{A}_c$ , we are able to estimate the standardized residual values at locations that should approx-  
 imately sample the true continuous boundary  $\partial\mathcal{A}_c$ , and thus we can apply the ideal bootstrap  
 procedure outlined in Section 2.2. Of course, in practice we apply this interpolation method on the  
 210 observed, noisy data, using the plug-in estimated boundary  $\partial\hat{\mathcal{A}}_c$ .

In the simulation results in Section 4, we assess performance of the method when the bootstrap  
 procedure is carried out over the true boundary  $\partial\mathcal{A}_c$ , and the plug-in estimated boundary  $\partial\hat{\mathcal{A}}_c$  that  
 must be used in practice.

#### 2.4. Assessment of Continuous Coverage on a Discrete Lattice

215 In testing the finite-sample validity of our method through simulation, it is imperative that we  
 are able to accurately measure when violations of the subset condition  $\hat{\mathcal{A}}_c^+ \subset \mathcal{A}_c \subset \hat{\mathcal{A}}_c^-$  occur.  
 While this may seem a trivial task, as touched on in the previous section, the boundaries of each  
 of these three sets can become ambiguous when data are collected on a discrete lattice.

To illustrate this point, consider the configuration of sets displayed in **Fig. 3a**. In this instance,  
 220 suppose the right half of the image corresponds to  $\mathcal{A}_c$  (green pixels overlapped by yellow), and

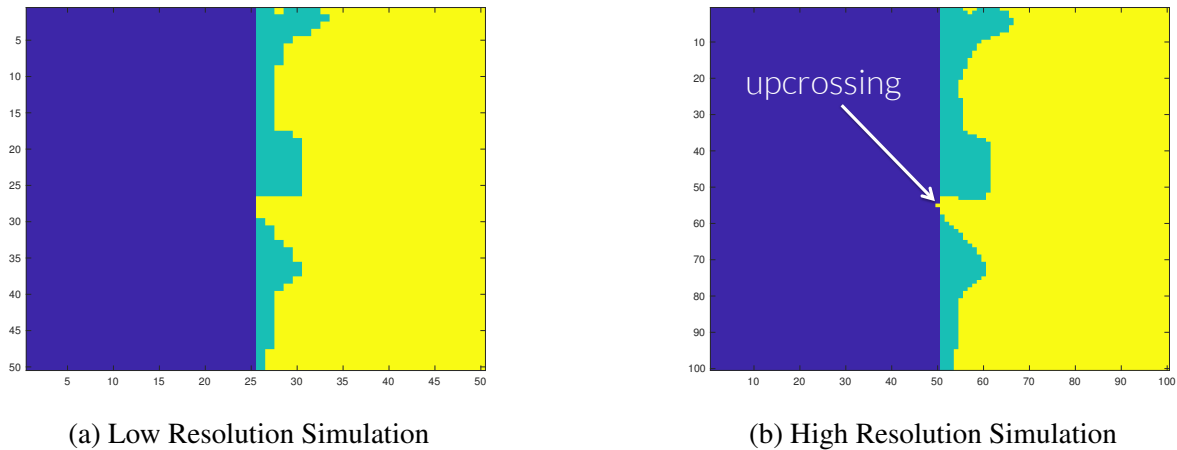

**Figure 3:** Demonstrating the resolution issue for testing the subset condition  $\hat{\mathcal{A}}_c^+ \subset \mathcal{A}_c \subset \hat{\mathcal{A}}_c^-$ .

**Figure 3a:** Here  $\mathcal{A}_c$  is comprised of the right half of the image (all green and yellow pixels), and  $\hat{\mathcal{A}}_c^+$  is shown as yellow pixels. It appears that  $\hat{\mathcal{A}}_c^+ \subset \mathcal{A}_c$ .

**Figure 3b:** The same configuration as **Fig. 3a** at double the resolution. Here, we have enough detail to see that  $\hat{\mathcal{A}}_c^+$  has crossed the boundary  $\partial\mathcal{A}_c$  (yellow seeping into blue), and the subset condition  $\hat{\mathcal{A}}_c^+ \subset \mathcal{A}_c$  has been violated.

yellow pixels belong to  $\hat{\mathcal{A}}_c^+$ . We wish to determine whether the condition  $\hat{\mathcal{A}}_c^+ \subset \mathcal{A}_c$  has been violated or not. One may argue that at the resolution for which the data have been acquired, all pixels that belong to  $\hat{\mathcal{A}}_c^+$  also belong to  $\mathcal{A}_c$ , and therefore no violation has occurred. However, the example presented in **Fig. 3a** has in fact been derived from a 2D simulation conducted at a higher resolution: this  $50 \times 50$  simulation was obtained by down-sampling a  $100 \times 100$  grid by dropping every other pixel. **Fig. 3a** displays the sets  $\mathcal{A}_c$  and  $\hat{\mathcal{A}}_c^+$  from the down-sampled, low resolution simulation, while **Fig. 3b** shows the same set of results at the original resolution. In **Fig. 3b** we see that there *has* been an upcrossing of the yellow pixels belonging to  $\hat{\mathcal{A}}_c^+$  over the boundary of the green, and therefore the subset condition  $\hat{\mathcal{A}}_c^+ \subset \mathcal{A}_c$  *has* been violated. From this simulation, it is clear that when we conclude that no violation has occurred in situations like **Fig. 3a**, our empirical coverage will miss violations and be positively biased. By an analogous argument the same issue occurs when testing violations of  $\mathcal{A}_c \subset \hat{\mathcal{A}}_c^-$ .

In SSS this direct comparison of the lattice representation of the three sets was used to assess

coverage in the simulations. While they observed this phenomenon of missed violations leading  
 235 to over-coverage, the proposed solution was to sequentially increase the resolution of the data. We  
 instead again make use of interpolation.

Since, in simulation, we know the true continuous mean image and  $\mathcal{A}_c$ , following the method  
 described in Section 2.2 we can obtain weights  $m_1$  and  $m_2$  to interpolate between points  $s_O$  and  $s_I$   
 either side of the true, continuous boundary  $\partial\mathcal{A}_c$ , in order to find a location  $s^*$  that approximately  
 240 lies on the boundary (if the true mean is linear, it would be exactly on the boundary). To determine  
 if  $s^* \in \hat{\mathcal{A}}_c^+$ , we then re-apply the weights  $m_1$  and  $m_2$  and assess whether

$$\mathbf{w}^T \hat{\boldsymbol{\beta}}(s^*) - k \hat{\sigma}(s^*)v_w = m_1 \left( \mathbf{w}^T \hat{\boldsymbol{\beta}}(s_O) - k \hat{\sigma}(s_O)v_w \right) + m_2 \left( \mathbf{w}^T \hat{\boldsymbol{\beta}}(s_I) - k \hat{\sigma}(s_I)v_w \right) \geq c. \quad (8)$$

If the inequality holds, then by definition  $s^* \in \hat{\mathcal{A}}_c^+$ . Otherwise,  $s^* \notin \hat{\mathcal{A}}_c^+$ , and therefore we can  
 conclude that the subset condition  $\hat{\mathcal{A}}_c^+ \subset \mathcal{A}_c$  has been violated. By checking whether  $\mathbf{w}^T \hat{\boldsymbol{\beta}}(s^*) +$   
 $k \hat{\sigma}(s^*)v_w \geq c$ , we can similarly test for a violation of  $\mathcal{A}_c \subset \hat{\mathcal{A}}_c^-$ .

245 By applying this interpolation scheme to all pairs of lattice points with one point inside, one  
 outside, the lattice representation of the boundary, we have devised a method to more accurately  
 assess violations of the subset condition  $\hat{\mathcal{A}}_c^+ \subset \mathcal{A}_c \subset \hat{\mathcal{A}}_c^-$  for configurations similar to **Fig. 3a**.  
 We applied this method for testing the subset condition in our simulations alongside a direct com-  
 parison of the lattice representations of the three sets of interest as was done in *SSS*. The addition  
 250 of the weighted interpolation method caused a considerable decrease in the empirical coverage  
 results towards the nominal level in all of our 3D simulations. Using the direct comparison of the  
 three sets on its own here essentially determined total empirical coverage ( $\hat{\mathcal{A}}_c^+ \subset \mathcal{A}_c \subset \hat{\mathcal{A}}_c^-$  for  
 all simulation runs), even when using small sample sizes and a low nominal coverage level. This  
 is likely to be because the discrete lattice of observed data points is relatively less dense inside  
 255 the true continuous process for larger, 3D settings, and therefore more violations of the subset  
 condition are missed if only a direct comparison of the lattice representation of the CSs is carried  
 out.

### 3. Methods

#### 3.1. Simulations

260 In this section we describe the settings used in order to evaluate the CSs obtained for synthetic data. As a simplified instance of the general linear model setup described in Section 2.1, we simulate 3000 independent samples of the signal-plus-noise model

$$Y_i(\mathbf{s}) = \mu(\mathbf{s}) + \epsilon_i(\mathbf{s}), \quad i = 1, \dots, N$$

using a range of signals  $\mu(\mathbf{s})$ , Gaussian noise structures  $\epsilon_i(\mathbf{s})$  with stationary and non-stationary variance, in two- and three-dimensional regions  $S$ . We compute the critical value  $k$ , applying the 265 Wild  $t$ -Bootstrap method outlined in Section 2.2 with  $B = 5000$  bootstrap samples to both the true boundary  $\partial\mathcal{A}_c$  and the plug-in boundary  $\partial\hat{\mathcal{A}}_c$  that would be used in practice. The boundaries were obtained using the interpolation method outlined in Section 2.3. We then compare the empirical coverage – the percentage of trials that the true thresholded signal is completely contained between the upper and lower CSs (i.e. the number of times for which  $\hat{\mathcal{A}}_c^+ \subset \mathcal{A}_c \subset \hat{\mathcal{A}}_c^-$ ) – across the two 270 sets of results, using the assessment method outlined in Section 2.4. In each simulation, we apply the method for sample sizes of  $N = 60, 120, 240$  and  $480$ , and using three nominal coverage probability levels  $1 - \alpha = 0.80, 0.90$  and  $0.95$ .

#### 3.2. 2D Simulations

We analyzed the performance of the CSs on a square region of size  $100 \times 100$ . For the true 275 underlying signal  $\mu(\mathbf{s})$  we considered two different raw effects: First, a linear ramp that increased from a magnitude of 1 to 3 in the x-direction while remaining constant in the y-direction (**Fig. 4.1a**). Second, a circular effect, created by placing a circular phantom of magnitude 3 and radius 30 in the centre of the search region, which was then smoothed using a 3 voxel FWHM Gaussian kernel (**Fig. 4.1b**). If we were to assume that each voxel had a size of  $2\text{mm}^3$ , we note that this 280 would amount to applying smoothing with a 6mm FWHM kernel, a fairly typical setting used in fMRI analyses.

To each of these signals we added subject-specific Gaussian noise  $\epsilon_i$ , also smoothed using a 3 voxel FWHM Gaussian kernel, with homogeneous and non-homogeneous variance structures:

The first noise field had a spatially constant standard deviation of 1 (**Fig. 4.2a**), the second field  
285 had a linearly increasing standard deviation structure in the y-direction from  $\sqrt{0.5}$  to  $\sqrt{1.5}$  while  
remaining constant in the x-direction (**Fig. 4.2b**). Thus, the variance of this noise field spatially  
increased in the y-direction from 0.5 to 1.5 in a non-linear fashion.

Altogether, the two underlying signals and two noise sources gave us four separate trials;  
across all of the simulations, we obtained Confidence Sets for the noise-free cluster  $\mathcal{A}_c$  at a cluster-  
290 forming threshold of  $c = 2$ .

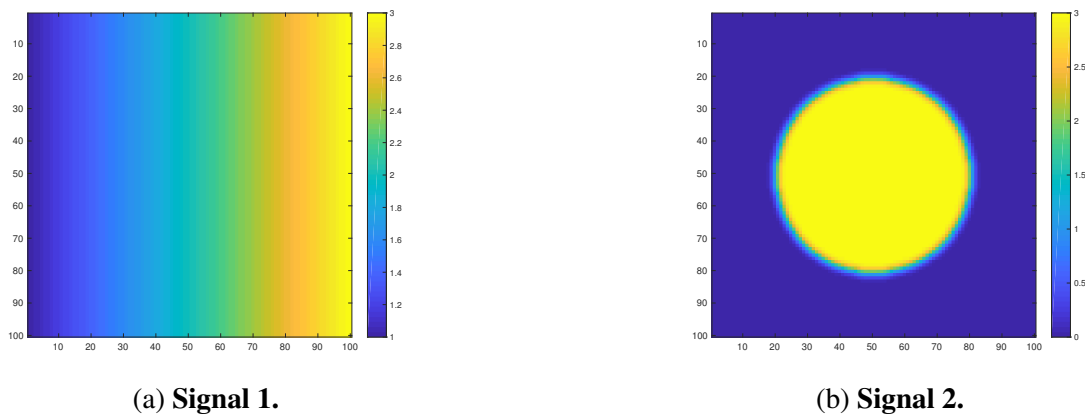

**Figure 4.1:** Linear ramp and circular signals  $\mu(s)$ .

**Figure 4.1a: Signal 1.** A linear ramp signal that increases from magnitude of 1 to 3 in the x-direction.

**Figure 4.1b: Signal 2.** A circular signal with magnitude of 3 and radius of 30, centred within the region and convolved with a 3 voxel FWHM Gaussian kernel.

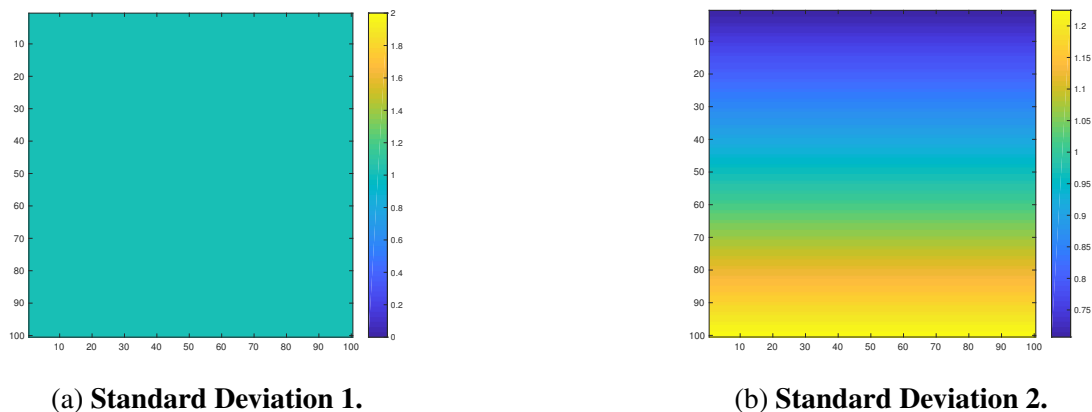

**Figure 4.2:** Stationary and non-stationary standard deviation fields of the noise  $\epsilon_i(s)$ .

**Figure 4.2a: Standard Deviation 1.** Stationary variance of 1 across the region.

**Figure 4.2b: Standard Deviation 2.** Non-stationary (linear ramp) standard deviation field increasing from  $\sqrt{0.5}$  to  $\sqrt{1.5}$  in the y-direction.

### 3.3. 3D Simulations

Four signal types  $\mu(s)$  were considered to analyze performance of the method in three dimensions. The first three of these signals were generated synthetically on a cubic region of size  $100 \times 100 \times 100$ : Firstly, a small spherical effect, created by placing a spherical phantom of magnitude 3 and radius 5 in the centre of the search region, which was then smoothed using a 3 voxel FWHM Gaussian kernel (**Fig. 5a**). Secondly, a larger spherical effect, generated identically to the first effect with the exception that the spherical phantom had a radius of 30 (**Fig. 5b**). Lastly, we created an effect by placing four spherical phantoms of magnitude 3 in the region of varying radii and then smoothing the entire image using a 3 voxel FWHM Gaussian (**Fig. 5c**). For each of these signals, the final image was re-scaled to have a maximum intensity of 3.

Similar to the two-dimensional simulations, for the three signals described above we added 3-voxel smoothed Gaussian noise of homogeneous and heterogeneous variance structures. The first noise field had a spatially constant standard deviation of 1, while the second field had a linearly increasing standard deviation in the z-direction from  $\sqrt{0.5}$  to  $\sqrt{1.5}$ , while remaining constant in both the x- and y- directions. For all three effects, we obtained Confidence Sets for the threshold  $c = 2$ .



For the final signal type, we took advantage of big data that has been made available through the UK Biobank in an attempt to generate an effect that replicated the true %BOLD change induced during an fMRI task. We randomly selected 4000 subject-level contrast of parameter estimate  
310 result maps from the Hariri Faces/Shapes task-fMRI data collected as part of the UK Biobank brain imaging study. Full details on how the data were acquired and processed is given in *Miller et al. (2016)*, *Alfaro-Almagro et al. (2018)* and the UK Biobank Showcase; information on the task paradigm is given in *Hariri et al. (2002)*. From these contrast maps, we computed a group-level full mean (**Fig. 5d**) and full standard deviation image. In the final simulation, we used the  
315 group-level Biobank mean image as the true underlying signal  $\mu(s)$  for each subject, and the full standard deviation image was used for the standard deviation of each simulated subject-specific Gaussian noise field  $\epsilon_i(s)$  added to the true signal. Because of the considerably large sample size of high-quality data from which these maps have been obtained, we anticipate that both of these images are highly representative of the true underlying fields that they approximate. Both images  
320 were masked using an intersection of all 4000 of the subject-level brain masks.

Once again, we smoothed the noise field using a 3 voxel FWHM Gaussian kernel; since the Biobank maps were written with voxel sizes of  $2\text{mm}^3$ , this is analogous to applying 6mm FWHM smoothing to the noise field of the original data. We obtained Confidence Sets for a threshold of  $c = 0.25\%$  BOLD change.

#### 325 3.4. Application to Human Connectome Project Data

For a real-data demonstration of the method proposed here, we computed CSs on 80 participants data from the Unrelated 80 package released as part of the Human Connectome Project (HCP, S1200 Release). We applied the method to subject-level contrast maps obtained for the 2-back vs 0-back contrast from the working memory task results included with the dataset. To  
330 compare the CSs with results obtained from standard fMRI inference procedures, we also performed a traditional statistical group-level analysis on the data. A one-sample  $t$ -test was carried out in SPM, using a voxelwise FWE-corrected threshold of  $p < 0.05$  obtained via permutation test with SPM's SnPM toolbox. We chose to use the HCP for its high-quality task-fMRI data, the working memory task specifically picked for its association with cognitive activations in sub-

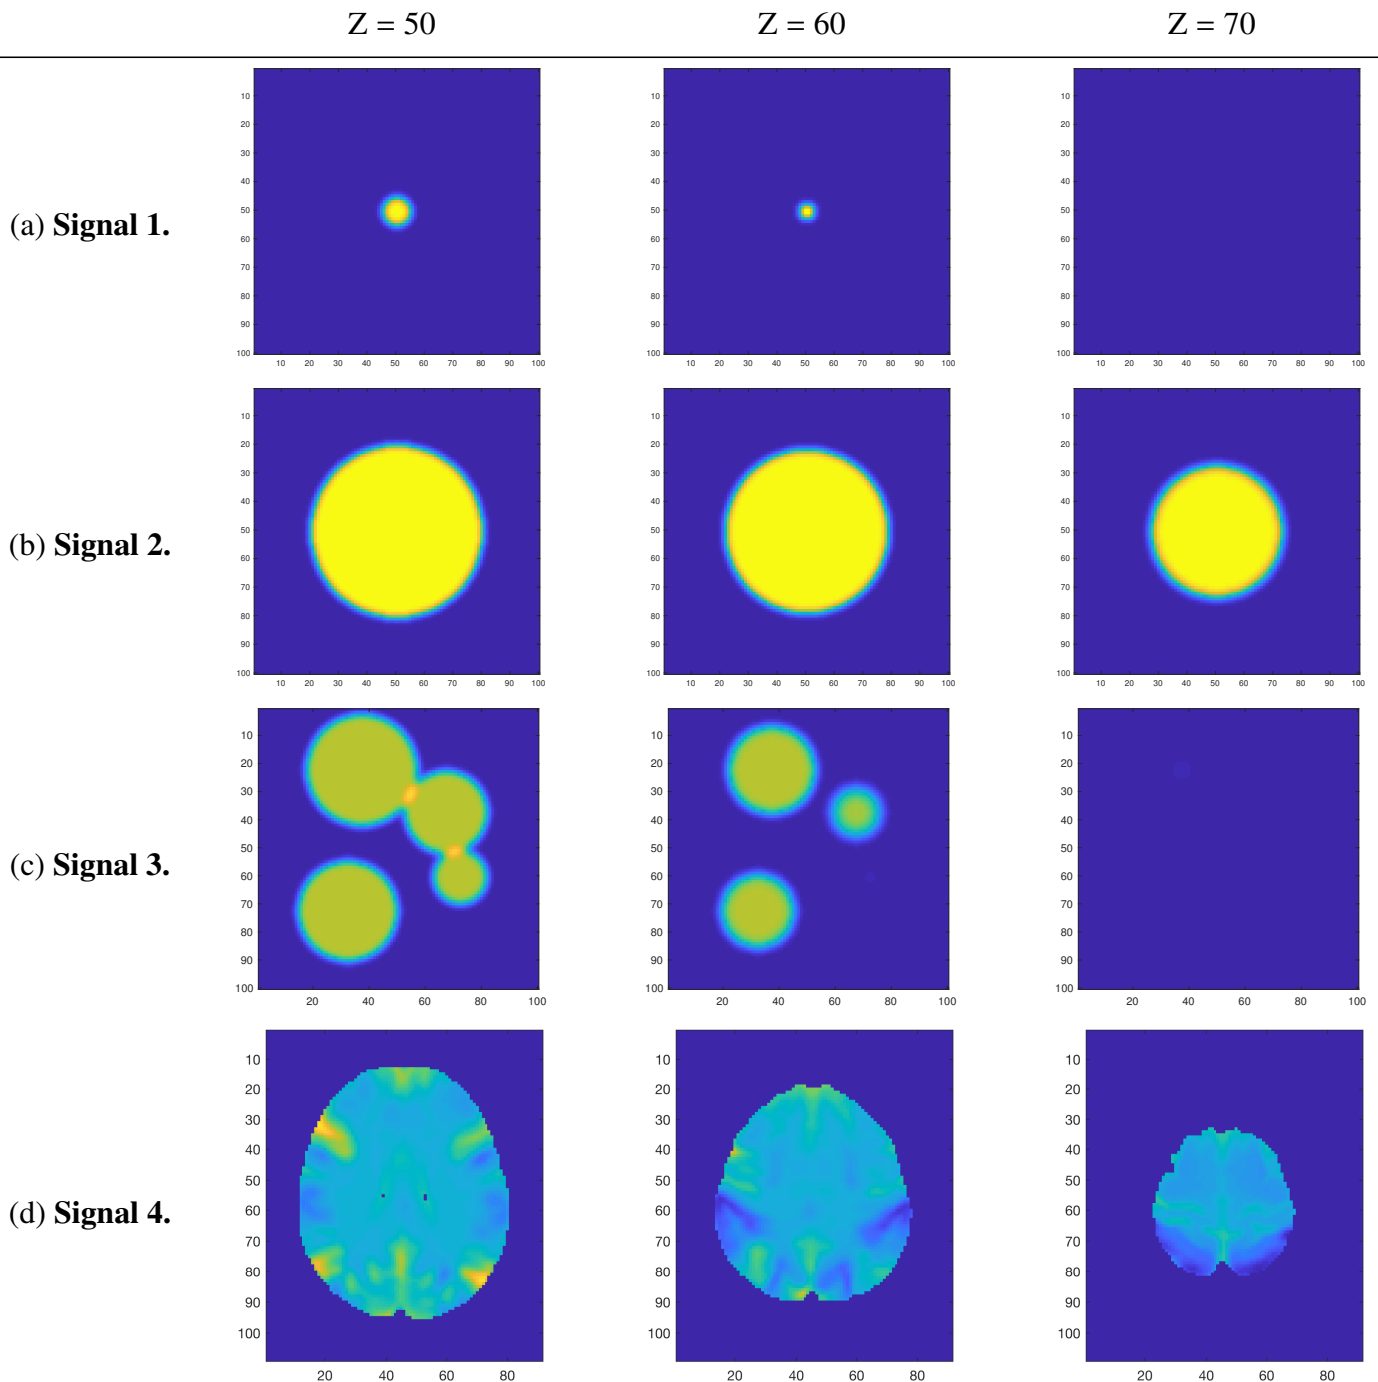

**Figure 5:** The four 3D signal types  $\mu(s)$ , from top-to-bottom: small sphere, large sphere, multiple spheres, and the UK Biobank full mean image. Note that the colormap limits for the first three signal types are from 0 to 3, while the colormap limits for the UK Biobank mean image is from -0.4 to 0.5.

335 cortical networks that can not be distinguished by the anatomy. Full details of the task paradigm, scanning protocol and analysis pipeline are given in *Barch et al. (2013)* and *Glasser et al. (2013)*, here we provide a brief overview.

For the working memory task participants were presented with pictures of places, tools, faces and body parts in a block design. The task consisted of two runs, where on each run a separate  
340 block was designated for each of the image categories, making four blocks in total. Within each run, for half of the blocks participants undertook a 2-back memory task, while for the other half a 0-back memory task was used. Eight EVs were included in the GLM for each combination of picture category and memory task (e.g. 2-back Place); we compute CSs on the subject-level contrast images for the 2-back vs 0-back contrast results that contrasted the four 2-back related  
345 EVs to the four 0-back EVs.

Imaging was conducted on a 3T Siemens Skyra scanner using a gradient-echo EPI sequence; TR = 720ms, TE = 33.1 ms, 208 × 180 mm FOV, 2.0 mm slice thickness, 72 slices, 2.0 mm isotropic voxels, and a multi-band acceleration factor of 8. Preprocessing of the subject-level data was carried out using tools from FSL and Freesurfer following the ‘fMRIVolume’ HCP Pipeline  
350 fully described in *Glasser et al. (2013)*. To summarize, the fundamental steps carried out to each individual’s functional 4D time-series data were gradient unwarping, motion correction, EPI distortion correction, registration of the functional data to the anatomy, non-linear registration to MNI space (using FSL’s Non-linear Image Registration Tool, FNIRT), and global intensity normalization. Spatial smoothing was applied using a Gaussian kernel with a 4mm FWHM.

355 Modelling of the subject-level data was conducted with FSL’s FMRIB’s Improved Linear Model (FILM). The eight working task EVs were included in the GLM, with temporal derivatives terms added as confounds of no interest, and regressors were convolved using FSL’s default double-gamma hemodynamic response function. The functional data and GLM were temporally filtered with a high pass frequency cutoff point of 200s, and time series were prewhitened to  
360 remove autocorrelations from the data.

In comparison to a typical fMRI study, the 4mm FWHM smoothing kernel size used in the HCP preprocessing pipeline is modest. Because of this, we applied additional smoothing to the final contrast images to emulate maps smoothed using a 6mm FWHM Gaussian kernel.

## 4. Results

### 365 4.1. Methodological Comparisons

In this work we have proposed two fundamental methodological changes to the procedures carried out in SSS: in Section 2.2 we suggested the Wild  $t$ -Bootstrap instead of the Gaussian Wild Bootstrap used for SSS, and in Section 2.4 we introduced the interpolation method for assessing empirical coverage alongside the direct comparison methods used for SSS. Here, we show the  
370 impact of these methodological innovations on the empirical coverage results from simulations carried out using two different synthetic signals, the 2D circular signal (**Signal 2.** in **Fig. 4.1b**) and the 3D large spherical signal (**Signal 2.** in **Fig. 5**). The standard deviation of the subject-specific Gaussian noise fields  $\epsilon_i(s)$  had a stationary variance of 1 across the region in both simulations (for the 2D case, this corresponds to **Standard Deviation 1.** in **Fig. 4.2**).

375 Empirical coverage results for each of the three confidence levels  $1 - \alpha = 0.80, 0.90$  and  $0.95$  are presented for the 2D circular signal in **Fig. 6.1** and for the 3D large spherical signal in **Fig. 6.2**. In both simulations, for all methods the bootstrap procedure was carried out over the estimated boundary  $\partial\hat{\mathcal{A}}_c$  (as must be done with real data). In each figure, the green curves highlight the results for the Gaussian Wild Bootstrap and coverage assessment method that were applied in SSS.  
380 The red curves highlight the results for the Wild  $t$ -Bootstrap and interpolation assessment method that we have proposed.

In **Fig. 6.1** and **Fig. 6.2**, all simulations using the direct comparison assessment (SSS Simulation Assessment) produced results substantially above the nominal level, converging to almost 100% for both the Gaussian Wild Bootstrap (green curves) and Wild  $t$ -Bootstrap (blue curves)  
385 methods across all three confidence levels. We suspect this is due to the resolution issue described in Section 2.4, suggesting that this assessment method missed violations of the coverage condition  $\hat{\mathcal{A}}_c^+ \subset \mathcal{A}_c \subset \hat{\mathcal{A}}_c^-$  causing a considerable positive bias in all of these results. Further evidence of this is suggested by the empirical coverage obtained for simulations using the interpolation assessment method (BTSN Simulation Assessment, pink and red curves), which appear to be converging  
390 much closer to the nominal level as is theoretically expected by Result 1.

Considering only the results using the interpolation assessment, in both figures empirical cov-

erage for the Wild Bootstrap method (pink curves) came below the nominal level for small sample sizes. For the 2D circle simulation, the empirical coverage result for 60 subjects was 84.7% for the nominal target of  $1 - \alpha = 0.95$  (right plot in **Fig. 6.1**). For the 3D spherical simulation this  
395 under-coverage was even more severe, where the corresponding empirical coverage result was 54.9% (right plot in **Fig. 6.2**). In comparison, coverage performance for the Wild  $t$ -Bootstrap method (red curves) was much improved, staying close to the nominal level in both the 2D and 3D simulations across all sample sizes. While for the 3D spherical signal the empirical coverage remained slightly above the nominal target, for the circular signal almost all results lie within the  
400 95% confidence interval of the nominal coverage level. For these reasons, in the remaining simulation results presented in this section we only consider the Wild  $t$ -Bootstrap method with our proposed interpolation assessment.

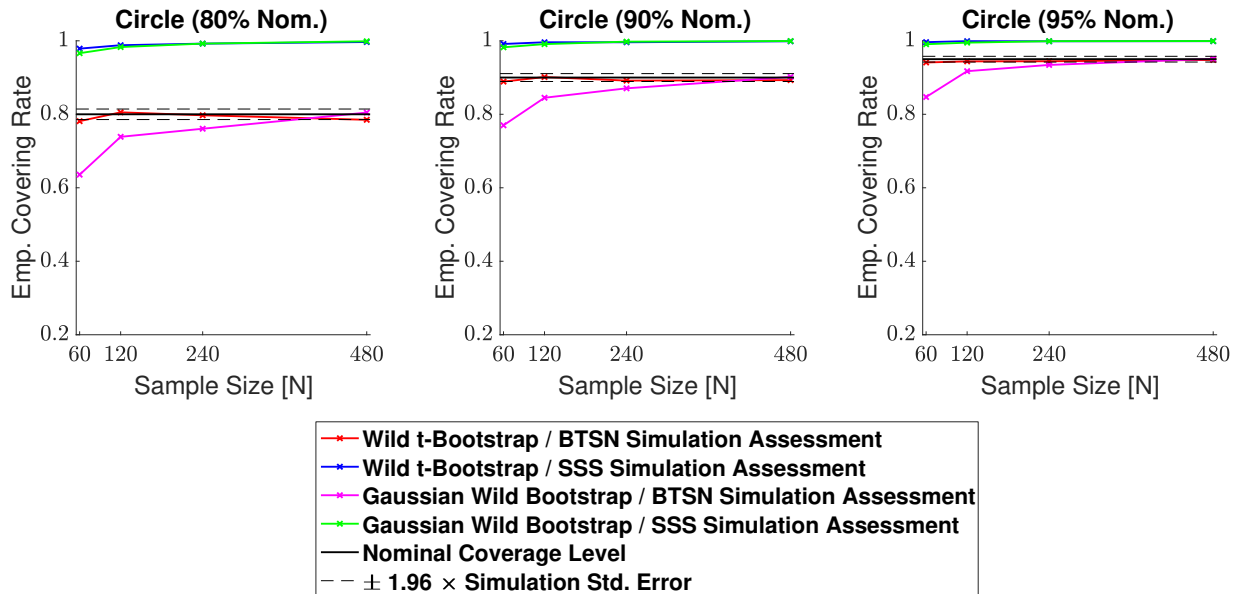

**Figure 6.1:** Coverage results for the 2D circular signal simulation with homogeneous Gaussian noise (**Signal 2., Standard deviation 1.** in **Fig. 4.2**). Empirical coverage results are presented for implementations of the CS method with and without the Wild  $t$ -Bootstrap we propose in Section 2.2 and the interpolation schema for assessing simulations results we propose in Section 2.4. All empirical coverage results for simulations using the SSS assessment method are close to 100%, suggesting that this assessment substantially biases the results upwards. Using our proposed assessment method, while both the Wild  $t$ -Bootstrap and Gaussian Wild bootstrap converge to the nominal level, the Wild  $t$ -Bootstrap performed better for small sample sizes.

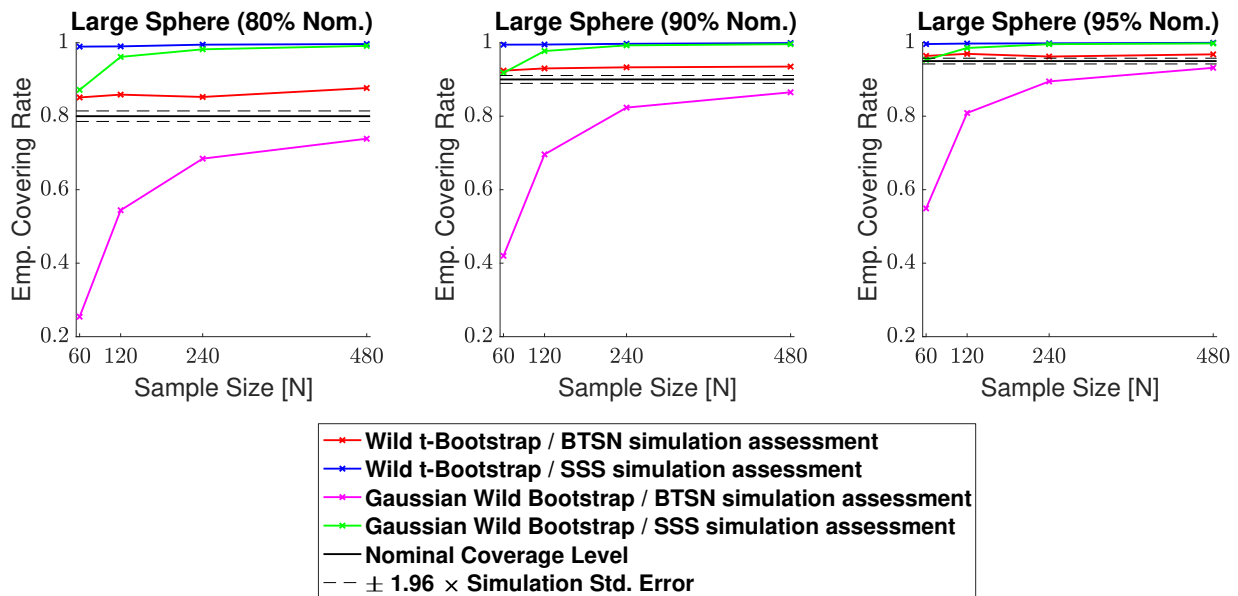

**Figure 6.2:** Coverage results for the 3D large spherical signal (**Signal 2.** in **Fig. 5**) simulation with homogeneous Gaussian noise. Empirical coverage results are presented for implementations of the CS method with and without the Wild  $t$ -Bootstrap we propose in Section 2.2, and the interpolation schema for assessing simulations results we propose in Section 2.4. Once again, all simulations using the  $SSS$  assessment method quickly converge to close to 100%. Using our proposed assessment method, the Gaussian Wild bootstrap had severe under-coverage for small sample sizes, while the Wild  $t$ -Bootstrap results hover slightly above the nominal level for all sample sizes.

## 4.2. 2D Simulations

Empirical coverage results for each of the three confidence levels  $1 - \alpha = 0.80, 0.90$  and  
405 0.95, are presented for the linear ramp signal (**Signal 1.** in **Fig. 4.1a**) in **Fig. 7.1**, and for the  
circular signal (**Signal 2.** in **Fig. 4.1b**) in **Fig. 7.2**. Results are also presented in tabular format in  
**Table. S1**. In both plots, results obtained for simulations applying the bootstrap procedure over  
the estimated boundary  $\partial\hat{\mathcal{A}}_c$  are displayed with a solid line, while results for simulations using the  
true boundary  $\partial\mathcal{A}_c$  are displayed with a dashed line. We emphasize that when computing CSs for  
410 real data, only the estimated boundary can be used.

For the linear ramp, across all confidence levels we observed valid, over-coverage for the  
estimated boundary method, and under-coverage for the true boundary method. In both cases,  
the degree of agreement between our empirical results and the nominal coverage level improved  
for larger confidence levels, and as the sample size increased. For instance, while our estimated  
415 boundary empirical results were around 88% when the nominal target level was set at 80% (**Fig.**  
**7.1**, left), corresponding empirical coverage results hovered around 97% for a nominal target of  
95% (**Fig. 7.1**, right). Comparing the differences between the solid and dashed curves, there is  
also greater harmonization between the estimated and true boundary results for higher confidence  
levels. The method performed similarly regardless of whether homogeneous or heterogeneous  
420 noise was added to the model, evidenced by the minimal differences between the red and the blue  
curves for each of the two boundary methods seen in the plots.

For the circular signal the method performed remarkably well, with almost all our empirical  
coverage results lying within the 95% confidence interval of the nominal coverage rate (red and  
blue curves sandwiched between black dashed lines for all three plots in **Fig. 7.2**). Once again, the  
425 use of homogeneous or heterogeneous noise in the model had minimal difference on the method's  
empirical coverage performance, and in this setting, our results were virtually identical whether  
the estimated boundary or true boundary was used for the bootstrap procedure. This has made the  
dashed curves hard to distinguish in the plots, as the solid curves lie practically on top of them.



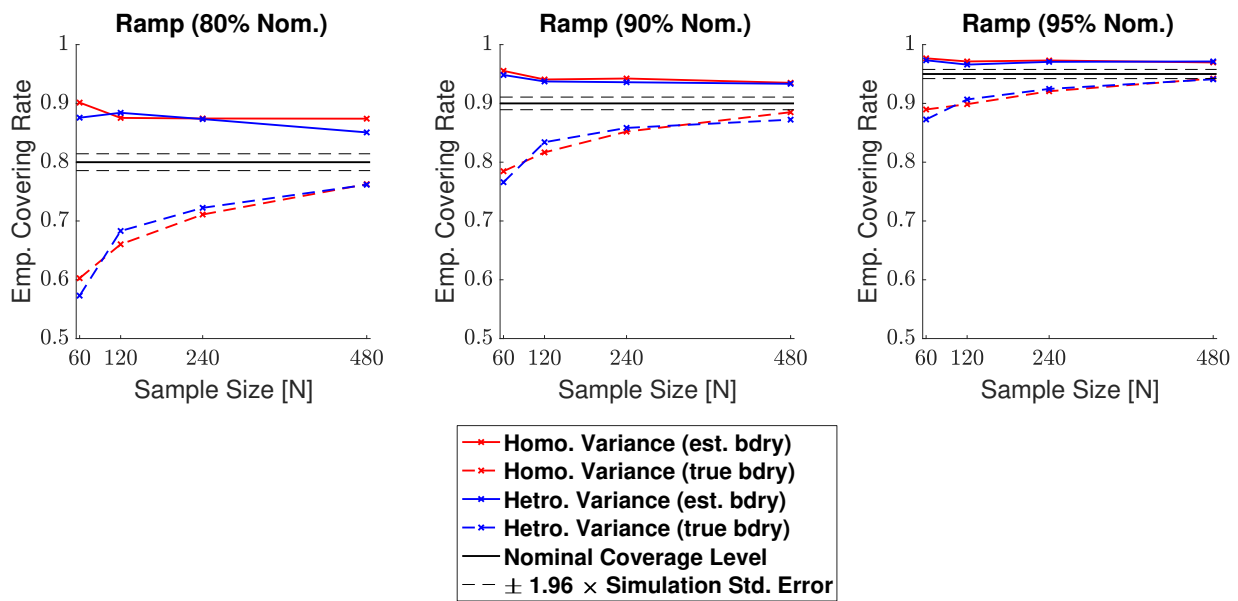

**Figure 7.1:** Coverage results for **Signal 1**, the 2D linear ramp signal. While the true boundary coverage results (dashed curves) fall under the nominal level, results for the estimated boundary method (solid curves) that must be applied to real data remain above the nominal level. Performance of the method improved for larger confidence levels, and in particular, the estimated boundary results for a 95% confidence level seen in the right plot hover slightly above nominal coverage for all sample sizes.

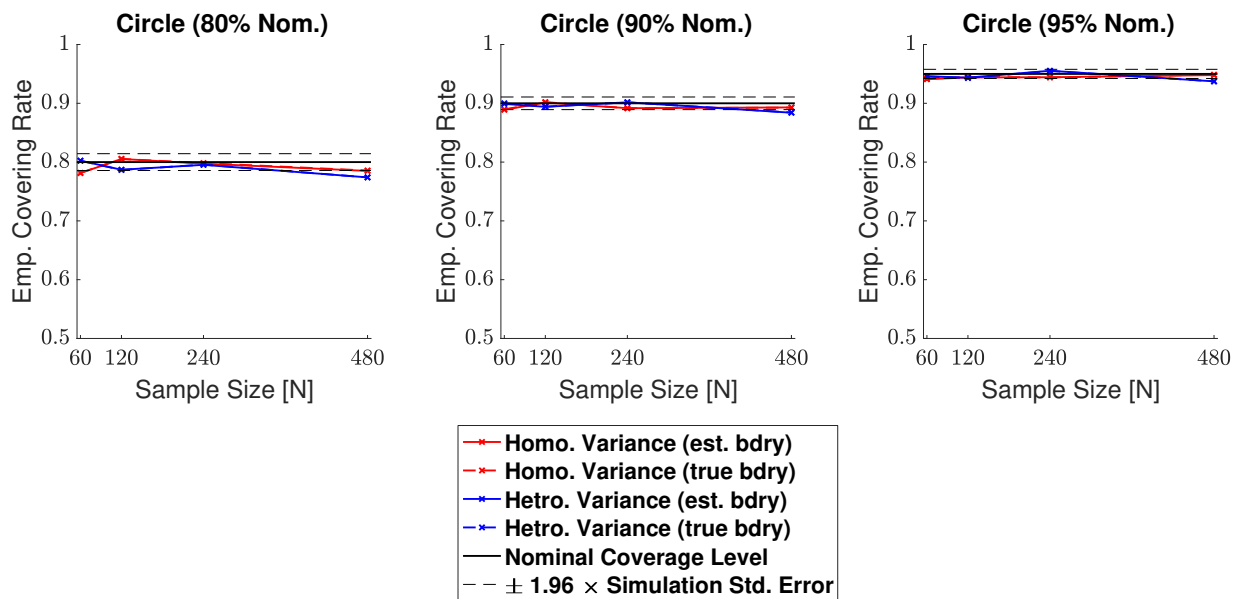

**Figure 7.2:** Coverage results for **Signal 2.**, the 2D circular signal. Coverage performance was close to nominal level in all simulations. The method was robust as to whether the subject-level noise had homogeneous (red curves) or heterogeneous variance (blue curves), or as to whether the estimated boundary (dashed curves) or true boundary (solid curves) method was used; in all plots, all of the curves lie practically on top of each other.

### 4.3. 3D Simulations

430 Empirical coverage results for each of the three confidence levels  $1 - \alpha = 0.80, 0.90$  and  $0.95$ , are presented in **Figs. 8.1, 8.2, 8.3** and **8.4** respectively for each of the four signal types (small sphere, large sphere, multiple spheres, Biobank full mean) displayed in **Fig. 5**. Results are also presented in tabular format in **Table. S2**. Once again, results obtained for simulations applying the bootstrap procedure over the estimated boundary  $\partial\hat{\mathcal{A}}_c$  are displayed with a solid line, and results  
435 for simulations using the true boundary  $\partial\mathcal{A}_c$  are displayed with a dashed line.

Overall, the results for all four signal types were consistent: In general, empirical coverage always came above the nominal target level, and the extent of over-coverage diminished when a higher confidence level was used. Particularly, for a nominal target of  $1 - \alpha = 0.95$ , all of our 3D empirical coverage results lie between 95% and 98%. The method was robust as to whether the  
440 bootstrap procedure was applied over the true or estimated boundary, or as to whether the variance of the noise field was homo- or heterogeneous. The similarity of the empirical coverage results, in spite of differences in these specific settings, is exhibited in all of the plots by the uniformity of the red and blues curves (indicating minimal differences in performance whether the noise had homogeneous or heterogeneous variance), and agreement between the solid and dashed curves  
445 (indicating minimal differences in performance whether the true boundary or estimated boundary was used). In the empirical coverage plots for the small and large spherical signals shown in **Figs. 8.1** and **8.2**, all of these curves lie virtually on top of each other.

While performance with the multiple spheres and Biobank signals presented in **Figs. 8.3** and **8.4** was slightly better when using the true boundary, the true- and estimated boundary perfor-  
450 mance converged as the sample size increased.

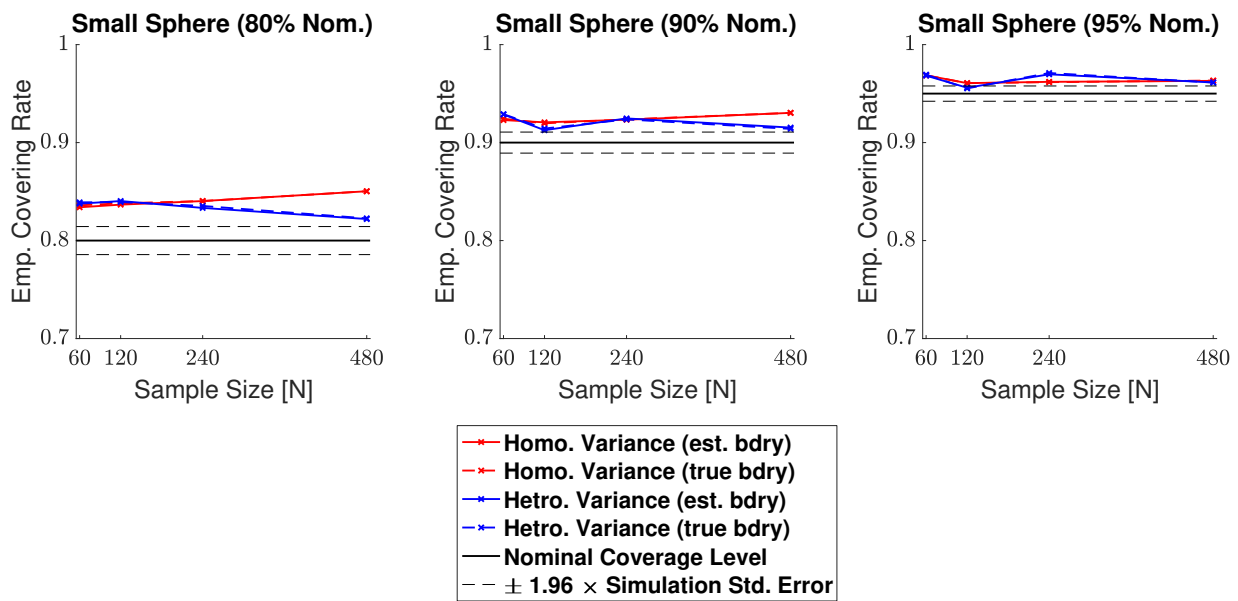

**Figure 8.1:** Coverage results for **Signal 1**, the 3D small spherical signal. For all confidence levels, coverage remained above the nominal level in all simulations, and for a 95% confidence level (right plot), coverage hovered slightly above the nominal level for all sample sizes. The method was robust as to whether the subject-level noise had homogeneous (red curves) or heterogeneous variance (blue curves), or as to whether the estimated boundary (dashed curves) or true boundary (solid curves) method was used.

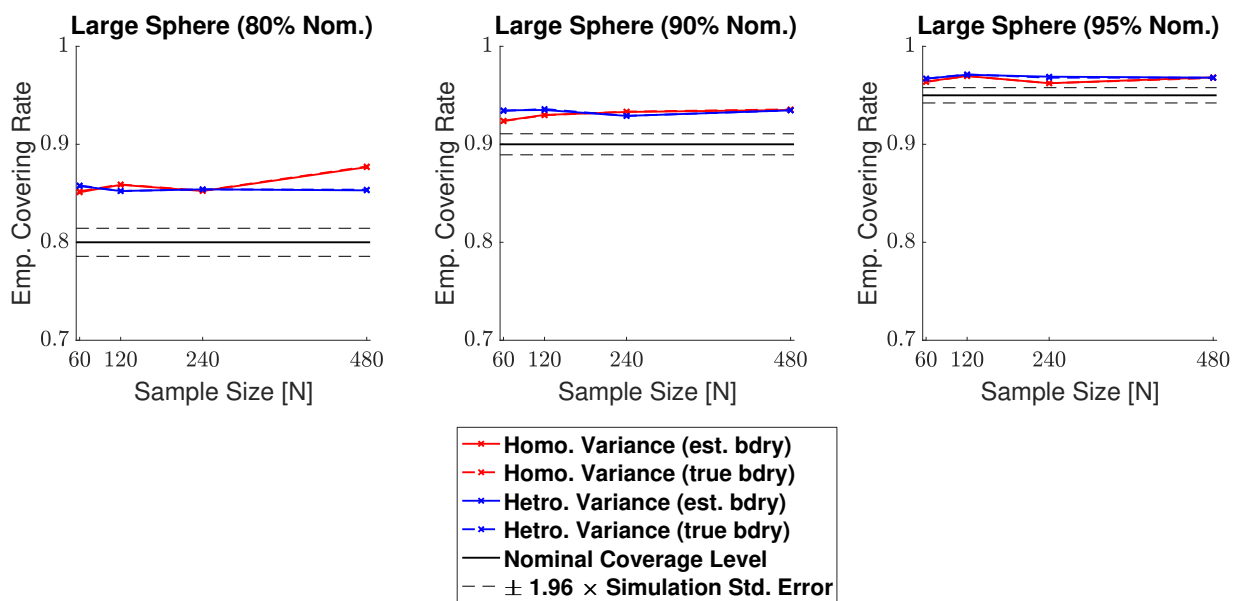

**Figure 8.2:** Coverage results for **Signal 2.**, the large 3D spherical signal. Coverage results here were very similar to the results for the small spherical signal shown in **Fig. 8.1**, suggesting that the method is robust to changes in boundary length.

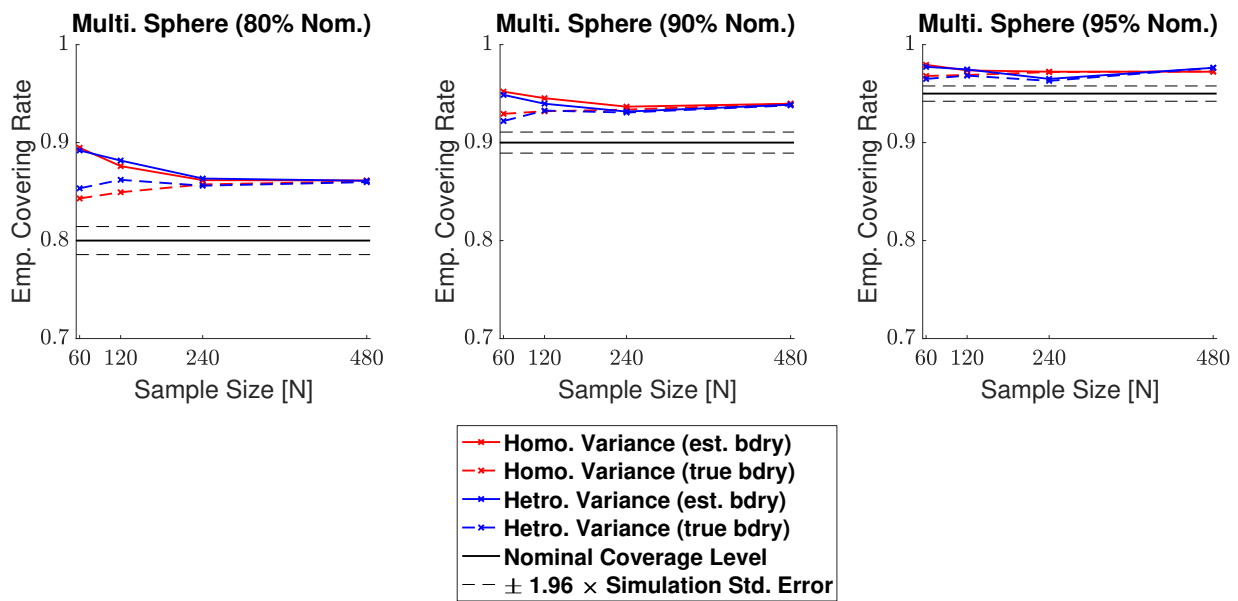

**Figure 8.3:** Coverage results for **Signal 3.**, the multiple spheres signal. Once again, for all confidence levels, coverage remained above the nominal level in all simulations. Here, the true boundary method (dashed curves) performed slightly better than the estimated boundary method (solid curves) in small sample sizes, although the choice of boundary made less of a difference for a higher confidence level. For a 95% confidence level (right plot), all results hover slightly above nominal coverage for all sample sizes.

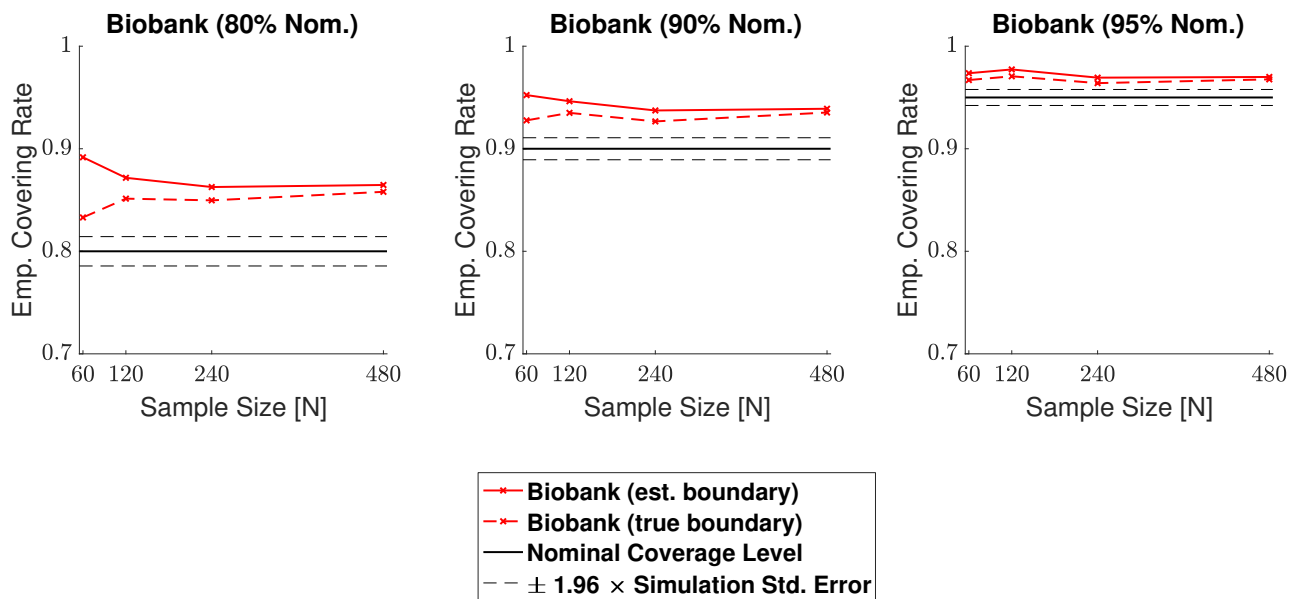

**Figure 8.4:** Coverage results for **Signal 4.**, the UK Biobank full mean signal, where the full standard deviation image was used as the standard deviation of the subject-level noise fields. Coverage results here were similar to the results for the multiple spheres signal shown in **Fig. 8.3**: In small sample sizes, coverage was slightly improved for the true boundary method (dashed curves) compared to the estimated boundary method (solid curves), however, for a 95% confidence level (right plots), all results hover slightly above nominal coverage for all sample sizes.

#### 4.4. Human Connectome Project

Confidence Sets obtained from applying the method to 80 subjects contrast data from the Human Connectome Project working memory task are shown in **Fig. 9** and **Fig. 10**.

In both **Fig. 9** and **Fig. 10**, the red upper CS localized brain regions within the frontal cortex commonly associated to working memory. This included areas of the middle frontal gyrus (left and right; **Fig. 9**, sagittal and coronal slices), superior frontal gyrus (left and right, **Fig. 10**, coronal slice) anterior insula (left and right; **Fig. 9**, sagittal and axial slices), as well as the anterior cingulate (**Fig. 10**, all slices). In all of the above regions, the method identified clusters of voxels for which we can assert with 95% confidence there was a percentage BOLD change raw effect greater than 2.0% (**Fig. 9** and **Fig. 10**, bottom plots).

Further brain areas localized by the upper CS were the frontal pole (left and right; **Fig. 9**, sagittal and axial slices), supramarginal gyrus (left and right; **Fig. 9**, sagittal slice and **Fig. 10**, coronal and axial slices), precuneous (**Fig. 10**, sagittal slice) and cerebellum (**Fig. 9**, sagittal slice). While for these areas we can assert with 95% confidence there was a percentage BOLD change raw effect greater than at least 1.0% (**Fig. 9** and **Fig. 10**, top plots), on-the-whole the method only localized areas where there was a BOLD change of at least 2.0% in parts of the frontal cortex. This can be observed by the ‘disappearance’ of the red CSs in brain regions located in the occipital lobe for the 2.0% BOLD change plots when compared with the corresponding 1.0% and 1.5% BOLD change plots in **Fig. 9** and **Fig. 10**.

As the percentage BOLD change threshold increases between plots, there is a shrinking of both the blue lower CSs and red upper CSs: By using a larger threshold, there are less voxels we can confidently declare have surpassed this higher level of percentage BOLD change, and thus the volume of the red upper CSs decreases (in some cases, vanishing). At the same time, there are more voxels we expect to be able to confidently declare have fallen below the threshold. Since these are precisely the (grey background) voxels that lie outside of the lower blue CSs, the volume of the blue lower CSs also decreases.

Finally, in **Fig. S1** and **Fig. S2** the red upper CSs are compared with the thresholded  $t$ -statistic map (green-yellow voxels) obtained from applying a traditional one-sample  $t$ -test group-analysis to the 80 subjects working memory task contrast data, using a voxelwise FWE-corrected threshold



480 of  $p < 0.05$ . Differences here highlight how statistical significance may not translate to practical significance; while over 28,000 voxels were declared as active in the thresholded  $t$ -statistic results, only 4,818 voxels were contained in the upper CS indicating a percentage BOLD change of at least 1.0%.

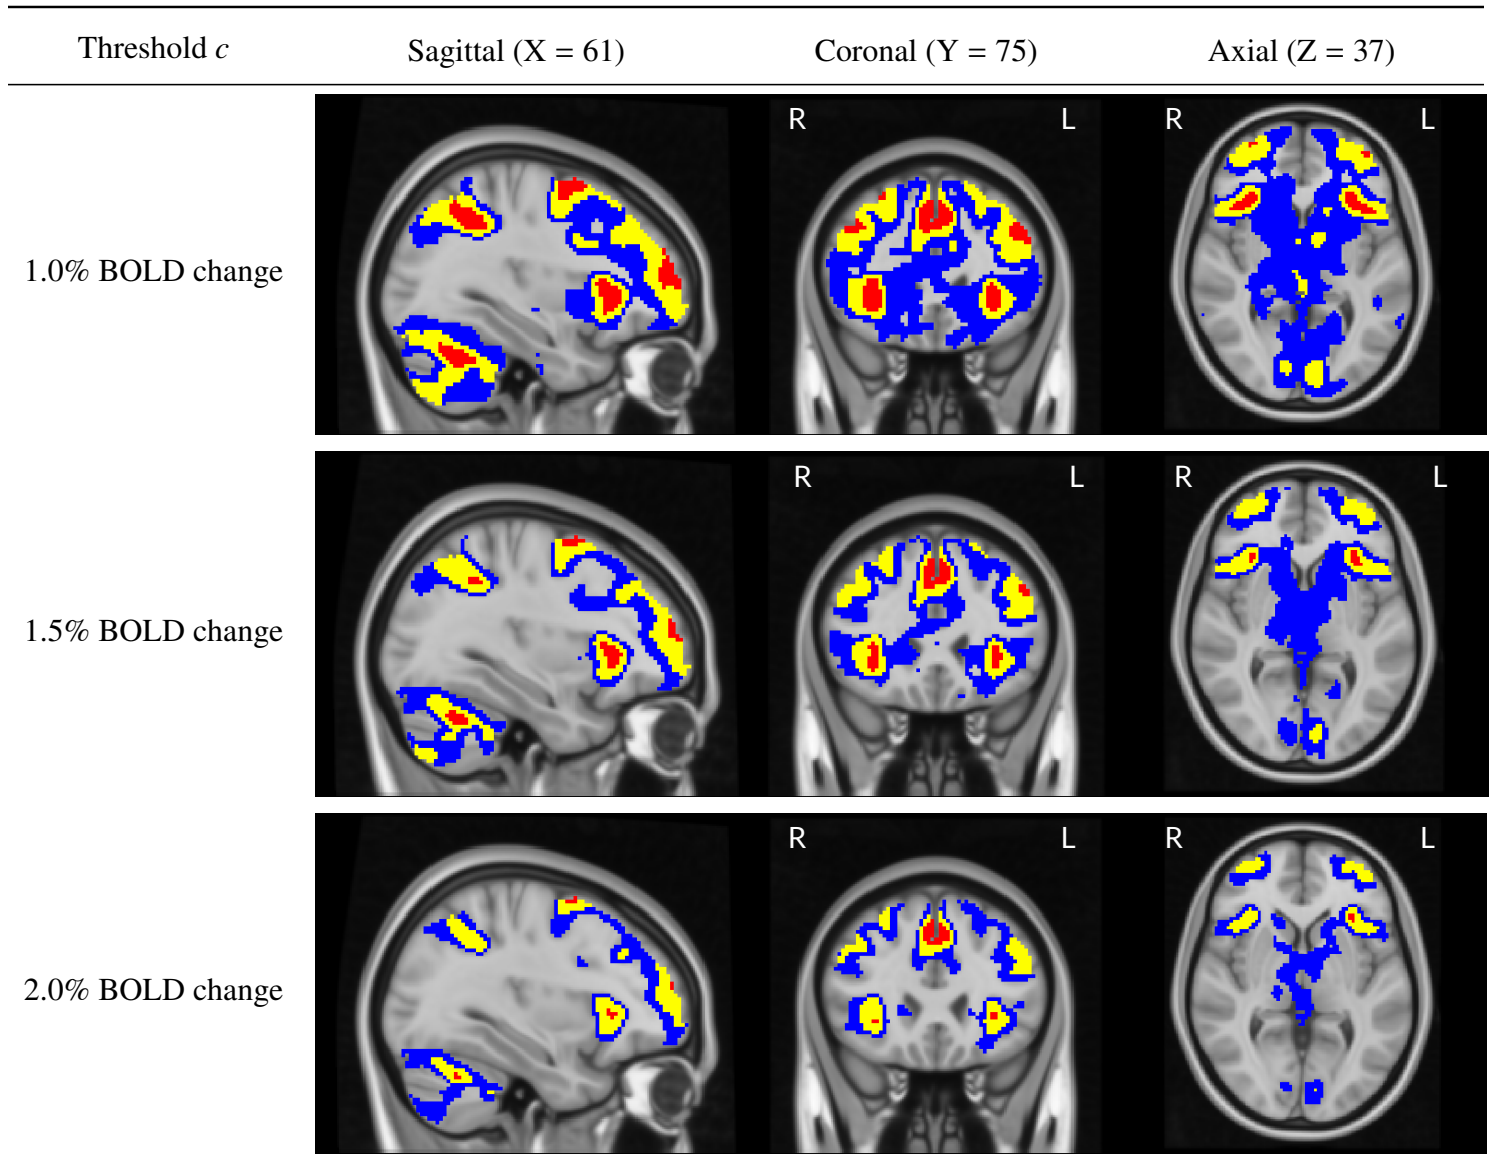

**Figure 9:** Slice views of the Confidence Sets for 80 subjects data from the HCP working memory task for  $c = 1.0\%$ ,  $1.5\%$  and  $2.0\%$  BOLD change thresholds. The upper CS  $\hat{\mathcal{A}}_c^+$  is displayed in red, and the lower CS  $\hat{\mathcal{A}}_c^-$  displayed in blue. In yellow is the point estimate set  $\hat{\mathcal{A}}_c$ , the best guess from the data of voxels that surpassed the BOLD change threshold. The red upper CS has localized regions in the frontal gyrus, frontal pole, anterior insula, supramarginal gyrus and cerebellum for which we can assert with 95% confidence that there has been (at least) a 1.0% BOLD change raw effect.

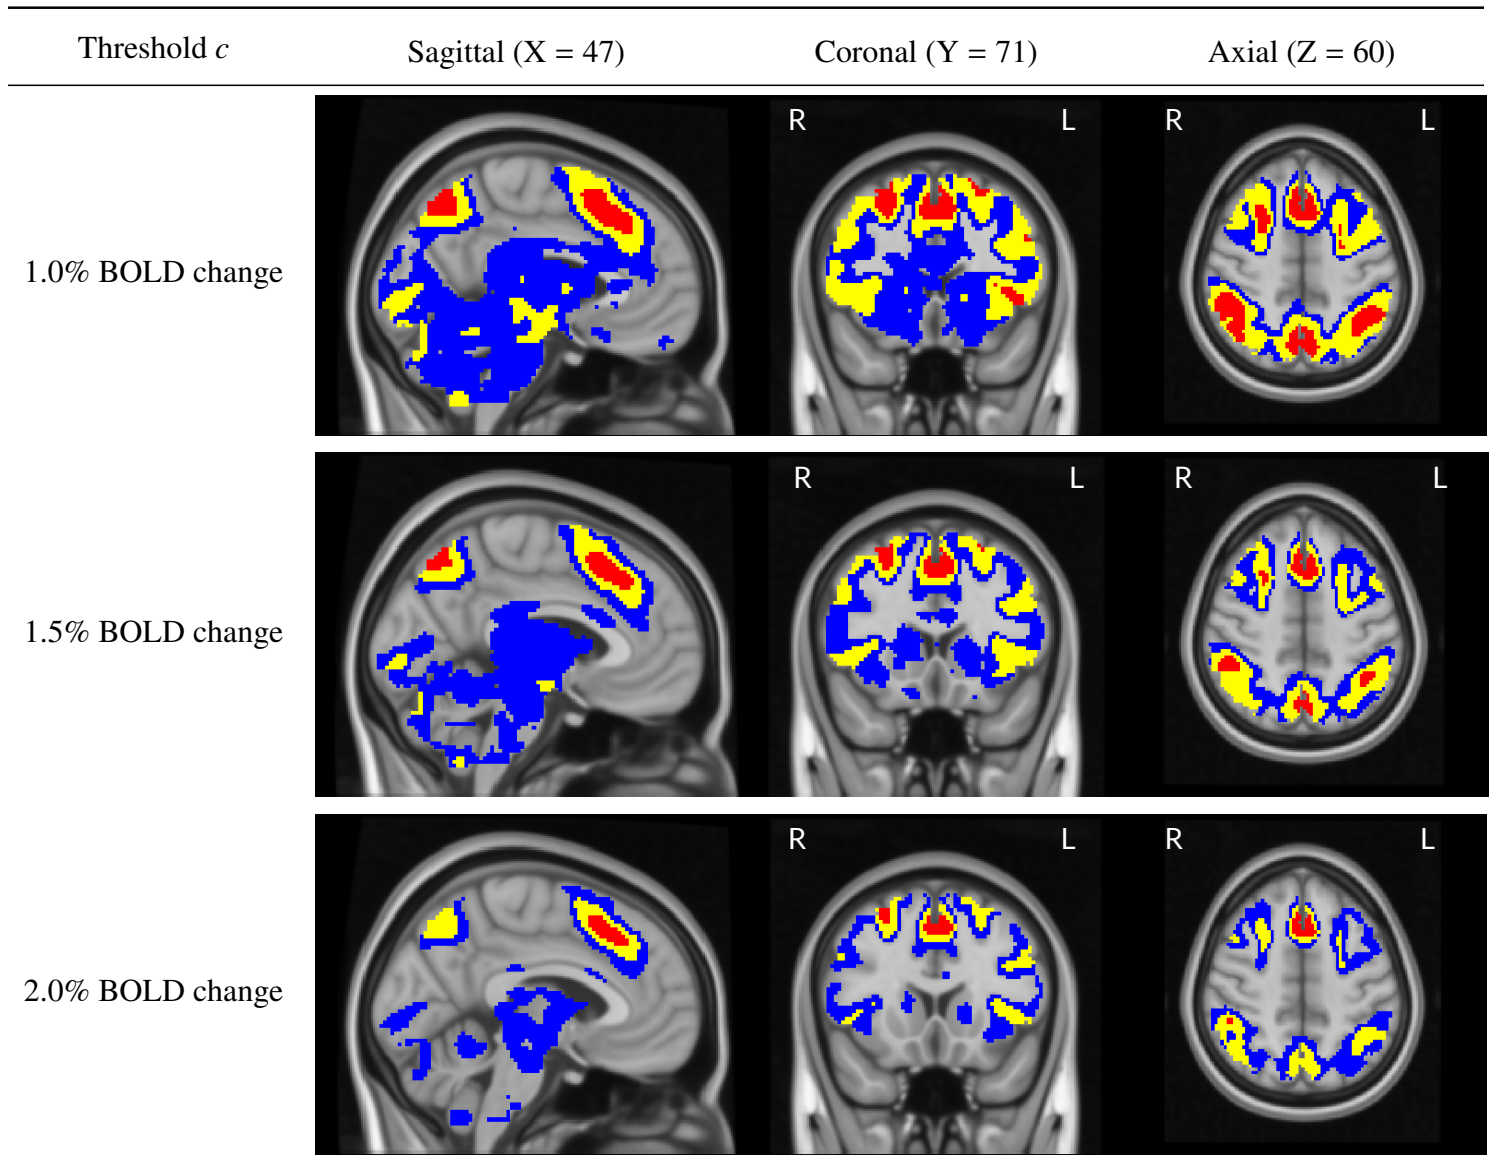

**Figure 10:** Further slice views of the Confidence Sets. Here, we see that the red upper CS has also localized regions in the anterior cingulate, superior front gyrus, supramarginal gyrus, and precuneus for which we can assert with 95% confidence that there has been (at least) a 1.0% BOLD change raw effect.

## 5. Discussion

### 485 5.1. Spatial Inference on %BOLD Raw Effect Size

Thorough interpretation of neuroimaging results requires an appreciation of the practical (as well as statistical) significance of differences through visualization of raw effect magnitude maps with meaningful units (Chen et al., 2017). In this work, we have presented a method to create confidence sets for raw effect size maps, providing formal confidence statements on regions of the brain where the %BOLD response magnitude has exceeded a specified activation threshold, alongside regions where the %BOLD response has *not* surpassed this threshold. Both of these statements are made simultaneously, and across the entire brain. This not only enables researchers to infer brain areas that have responded to a task, but also allows for inference on areas that did not respond to the task. In this sense, the method goes beyond statistical hypothesis testing, where the null-hypothesis of no activation can ‘fail to be rejected’, but never accepted. By operating on percentage BOLD change units, instead of  $t$ -statistic values, the confidence set maps present a clear and more direct interpretation of the biophysical changes that occur during a neuroimaging study, which can be distorted by the thresholded statistic maps commonly reported at the end of an investigation (Engel and Burton, 2013). In essence, the CSs synthesize information that is usually provided separately in a raw effect size and  $t$ -statistic map, determining practically significant effects in terms of effect magnitude, that are also reliable in terms of statistical significance traditionally given by  $p$ -values in a statistic image. While in this work we have focused on BOLD fMRI, the methods presented here are applicable to any neuroimaging measure that can be fit in a group-level GLM.

505 The choice of threshold  $c$  is ultimately up to the user, and may depend on the aims of the investigation. Researchers may choose a threshold based on prior knowledge of raw effect sizes observed in previous similar studies, and it is likely that localization of larger raw effects will be possible as sample sizes increase. Obtaining the CSs for the Human Connectome Project contrast data in this work was computationally quick, each analysis taking no longer than a couple of minutes. Therefore, one possible strategy is to evaluate a variety of different  $c$ ’s on pilot or historical data before fixing a value to use on a study of interest.

## 5.2. Analysis of HCP data and Simulation Results

In our analysis of the HCP emotional faces task-fMRI dataset, we have primarily focused on activated areas localized by the red upper CS. However, the confidence set maps in **Fig. 9** and **Fig. 10** also quantify the spatial precision of the point estimate ‘best guess from the data’ activation clusters. While so far we have described the confidence sets in terms of the red and blue upper and lower CSs, we now highlight that the set difference between the upper and lower CSs acts as a confidence region itself; with 95% confidence, we can assert that the boundary of the point estimate set (raw effect size > threshold; yellow voxels overlapped by red in **Fig. 9** and **Fig. 10**) is completely contained within this region. The set difference region, visualized by blue and yellow voxels (but not red) in **Fig. 9** and **Fig. 10**, therefore anticipates how the point estimate clusters may fluctuate if the experiment was to be repeated again. From this perspective, the vast areas of the brain covered by blue in **Fig. 9** and **Fig. 10** demonstrate the high level of uncertainty in localizing a raw effect size of, for example, 1.0% BOLD change, despite the large sample size of  $N = 80$  used for the HCP. The regions of greatest uncertainty were sub-cortical areas, covered by expansive clusters of blue as seen in the axial slices displayed in **Fig. 9** and sagittal slices in **Fig. 10**. Large intersubject variability here may be explained by the high multi-band acceleration factor used in the HCP scanning protocol, which is generally more suited for scanning the cortex (Smith et al., 2013).

For the 2D simulations, the method achieved close to nominal coverage for the circular signal, but performed less well for the ramp signal, obtaining under-coverage for the true boundary method and over-coverage for the estimated boundary method. We believe differences in the circle and ramp results are not due to changes in the signal shape per se, but instead are caused by differences in the slope of each shape close to the true boundary  $\partial\mathcal{A}_c$ . Since the linear ramp signal has a shallower gradient at the true boundary compared to the circle, local changes in the observed signal around the boundary are dominated by changes in the noise. Since the noise is more wavy than the signal, the linear interpolation method for obtaining the boundary is likely to be less accurate for the ramp, causing too many violations of the subset condition, which may explain the under-coverage for the true boundary results seen here.

For the 3D simulations, the method obtained over-coverage in all of our results. Here, the

degree of over-coverage was consistently larger for the smaller confidence level of  $1 - \alpha = 0.80$  in comparison to the larger confidence level of  $1 - \alpha = 0.95$ . Notably, the over-coverage was also more severe for signals with a longer boundary, such as the multiple spheres and Biobank signals, when compared to the Small Sphere signal that had a shorter boundary length. One possible reason for this is that our proposed method for assessing coverage may still be missing instances where violations of the subset condition  $\hat{\mathcal{A}}_c^+ \subset \mathcal{A}_c \subset \hat{\mathcal{A}}_c^-$  occur, causing the results to be slightly positively biased. While our assessment method reduces the influence of grid coarseness by sampling locations on the true continuous boundary  $\partial A_c$ , ultimately we can still only assess coverage at a discrete set of points on a continuous process. For signals with a longer boundary length, the set of sampled locations obtained with the interpolation method is relatively less dense within the true continuous boundary, and thus it is more likely violations of the subset condition are missed. Over-coverage for smaller confidence levels may also be explained by this, as theoretically more violations should occur here, but these may be missed due to inaccuracies caused by the discreteness of the lattice. This line of reasoning is consistent with Section 4.4 of *SSS*, where it was shown that coverage approached the nominal level as the resolution of the grid was increased.

### 5.3. Methodological Innovations

In this work, we have advanced on the original methods applied in *SSS*. From a theoretical standpoint, we have proposed a Wild  $t$ -Bootstrap method (dividing bootstrap residuals by bootstrap standard deviation) to compute the critical quantile value  $k$ . We have also introduced an interpolation scheme for obtaining the boundary and assessing the simulation coverage results to reduce the influence of grid coarseness. In Section 4.1, we demonstrated that applying the assessment method in *SSS* could lead to empirical coverage of close to 100%, suggesting that this method may considerably bias the simulation results upwards. When using our proposed assessment, the Wild Bootstrap method suffered from under-coverage, most severely for small sample sizes in the 3D setting of the large spherical signal presented in **Fig. 6.2**. This was greatly remedied by the Wild  $t$ -Bootstrap method, for which empirical results stayed close to the nominal target independent of sample size.

Our simulations using the original procedures may not seem consistent with the simulation

570 results published in Figure 5 of *SSS*, where empirical coverage stayed close to the nominal target. However, the signal-plus-noise models investigated to test the performance of the CSs in *SSS* were much smoother than the synthetic signals considered to emulate fMRI data with this effort. By applying a larger degree of smoothing, the signals used in *SSS* effectively had a much higher resolution. Because of this, it is likely the resolution issue presented in **Fig. 3** was less critical, reducing the positive bias in empirical coverage induced from using the original simulation assessment procedure. Further evidence for this is provided in Figure 7 of *SSS*, where they observed an increase in coverage after repeating their simulations on a coarser lattice. In our simulation results in Section 4.1, the scale of under-coverage from using the Gaussian Wild bootstrap method was much more severe for the 3D simulation on the spherical signal in **Fig. 6.2** compared to the 2D circular signal in **Fig. 6.1**. This may explain why the Gaussian Wild bootstrap method performed  
580 relatively well in *SSS*, as only 2D signals were considered there.

#### 5.4. *Limitations & Future Work*

The principal limitation of this work is one that is intentional and explicit: Our method is for spatial inference on maps of raw and not standardized effects, such as Cohen's  $d$  or partial  $R^2$  ( $t$ - or  $F$ -statistics, which scale with sample size, do not estimate population quantities and are not  
585 suitable for making confidence statements). Even when scaled to percentage BOLD change, it has been shown that raw effects can modulate with acquisition parameters such as the scanner field strength or echo time (Ujoudag et al., 2009). Users should therefore be cautious when combining effect estimates from studies using heterogeneous acquisition setups, and clearly specify such differences when reporting the results of any meta-analysis on raw effects. It is also known that  
590 inhomogeneities in the vasculature of the brain is a cause of variation in the BOLD response. Therefore, we recommend that any interpretation of %BOLD change inferred from the CSs is referenced against a variance map or similar image that indicates the most venous brain regions. We note that each of these points are general complications of raw effect sizes within fMRI, rather than issues with the method proposed in this effort per se. Nonetheless, the use of standardized  
595 effect estimates may help to remedy these problems in the future. The statistical characteristics of standardized effect maps are fundamentally different to the raw effect images motivating the

method here, and the topic of our current work is to develop CSs for standardized effect size images.

The need for resampling to conduct inference is another limitation of this effort, especially given the big data motivation of this work. However, the bootstrap is only conducted on the estimated boundary,  $\partial\hat{\mathcal{A}}_c$ , not the whole 3D volume, which substantially reduces the computational burden. For very large datasets, techniques for approximating empirical distributions can be used to improve the accuracy of the estimation of  $k$  based on a smaller number (e.g.  $B = 500$ ) of bootstrap samples (Winkler et al., 2016).

## 6. Contributions

A.B. drafted the manuscript. All authors edited and revised the manuscript. A.B. proposed use of Rademacher variables for the bootstrap and developed the method for assessing simulations. F.T. proposed use of the Wild  $t$ -Bootstrap method and developed the linear interpolation method for approximating the boundary. A.B. conducted simulations and data analysis, with additional contributions from F.T. to the simulation and simulation figures code. A.S. and T.E.N. oversaw the project in all its intellectual, methodological and computational aspects.

## 7. Data Availability

We have used data from The Human Connectome Project and UK Biobank. All code used for the simulations and analysis of HCP data are available at:

[https://github.com/AlexBowring/Spatial\\_Confidence\\_Sets\\_Raw](https://github.com/AlexBowring/Spatial_Confidence_Sets_Raw).

## 8. Acknowledgements

TEN is supported by the Wellcome Trust (100309/Z/12/Z). AS and FT were partially supported by NIH grants (R01CA157528 and R01EB026859). The authors would like to thank Max Sommerfeld for his early involvement in the project, and Samuel Davenport for helping to process the Biobank Data used in the Simulations section.



## 9. References

- Fidel Alfaro-Almagro, Mark Jenkinson, Neal K Bangerter, Jesper L R Andersson, Ludovica Griffanti, Gwenaëlle Douaud, Stamatiou N Sotiropoulos, Saad Jbabdi, Moises Hernandez-Fernandez, Emmanuel Vallee, Diego Vidaurre, Matthew Webster, Paul McCarthy, Christopher Rorden, Alessandro Daducci, Daniel C Alexander, Hui Zhang, Iulius Dragonu, Paul M Matthews, Karla L Miller, and Stephen M Smith. Image processing and quality control for the first 10,000 brain imaging datasets from UK biobank. *Neuroimage*, 166:400–424, February 2018.
- Deanna M Barch, Gregory C Burgess, Michael P Harms, Steven E Petersen, Bradley L Schlaggar, Maurizio Corbetta, Matthew F Glasser, Sandra Curtiss, Sachin Dixit, Cindy Feldt, Dan Nolan, Edward Bryant, Tucker Hartley, Owen Footer, James M Bjork, Russ Poldrack, Steve Smith, Heidi Johansen-Berg, Abraham Z Snyder, David C Van Essen, and WU-Minn HCP Consortium. Function in the human connectome: task-fMRI and individual differences in behavior. *Neuroimage*, 80:169–189, October 2013.
- Gang Chen, Paul A Taylor, and Robert W Cox. Is the statistic value all we should care about in neuroimaging? *Neuroimage*, 147:952–959, February 2017.
- Victor Chernozhukov, Denis Chetverikov, and Kengo Kato. Gaussian approximations and multiplier bootstrap for maxima of sums of high-dimensional random vectors, 2013.
- Russell Davidson and Emmanuel Flachaire. The wild bootstrap, tamed at last. *J. Econom.*, 146(1):162–169, September 2008.
- Stephen A Engel and Philip C Burton. Confidence intervals for fMRI activation maps. *PLoS One*, 8(12):e82419, December 2013.
- K J Friston, A P Holmes, K J Worsley, J P Poline, C D Frith, and R S J Frackowiak. Statistical parametric maps in functional imaging: A general linear approach. *Hum. Brain Mapp.*, 2(4):189–210, 1994a.
- K J Friston, K J Worsley, R S Frackowiak, J C Mazziotta, and A C Evans. Assessing the significance of focal activations using their spatial extent. *Hum. Brain Mapp.*, 1(3):210–220, 1994b.
- Matthew F Glasser, Stamatiou N Sotiropoulos, J Anthony Wilson, Timothy S Coalson, Bruce Fischl, Jesper L Andersson, Junqian Xu, Saad Jbabdi, Matthew Webster, Jonathan R Polimeni, David C Van Essen, Mark Jenkinson, and WU-Minn HCP Consortium. The minimal preprocessing pipelines for the human connectome project. *Neuroimage*, 80:105–124, October 2013.
- Javier Gonzalez-Castillo, Ziad S Saad, Daniel A Handwerker, Souheil J Inati, Noah Brenowitz, and Peter A Bandettini. Whole-brain, time-locked activation with simple tasks revealed using massive averaging and model-free analysis. *Proc. Natl. Acad. Sci. U. S. A.*, 109(14):5487–5492, April 2012.
- Ahmad R Hariri, Alessandro Tessitore, Venkata S Mattay, Francesco Fera, and Daniel R Weinberger. The amygdala response to emotional stimuli: A comparison of faces and scenes. *Neuroimage*, 17(1):317–323, September 2002.
- Paul E Meehl. Theory-Testing in psychology and physics: A methodological paradox. *Philos. Sci.*, 34(2):103–115, June 1967.

- 655 Karla L Miller, Fidel Alfaro-Almagro, Neal K Bangerter, David L Thomas, Essa Yacoub, Junqian Xu, Andreas J Bartsch, Saad Jbabdi, Stamatios N Sotiropoulos, Jesper L R Andersson, Ludovica Griffanti, Gwenaëlle Douaud, Thomas W Okell, Peter Weale, Iulius Dragonu, Steve Garratt, Sarah Hudson, Rory Collins, Mark Jenkinson, Paul M Matthews, and Stephen M Smith. Multimodal population brain imaging in the UK biobank prospective epidemiological study. *Nat. Neurosci.*, 19(11):1523–1536, November 2016.
- 660 Thomas E Nichols, Samir Das, Simon B Eickhoff, Alan C Evans, Tristan Glatard, Michael Hanke, Nikolaus Kriegeskorte, Michael P Milham, Russell A Poldrack, Jean-Baptiste Poline, Erika Proal, Bertrand Thirion, David C Van Essen, Tonya White, and B T Thomas Yeo. Best practices in data analysis and sharing in neuroimaging using MRI. *Nat. Neurosci.*, 20(3):299–303, February 2017.
- Regina Nuzzo. Scientific method: statistical errors. *Nature*, 506(7487):150–152, February 2014.
- 665 Russell A Poldrack, Jeanette A Mumford, and Thomas E Nichols. *Handbook of Functional MRI Data Analysis*. Cambridge University Press, August 2011.
- Russell A Poldrack, Chris I Baker, Joke Durnez, Krzysztof J Gorgolewski, Paul M Matthews, Marcus R Munafò, Thomas E Nichols, Jean-Baptiste Poline, Edward Vul, and Tal Yarkoni. Scanning the horizon: towards transparent and reproducible neuroimaging research. *Nat. Rev. Neurosci.*, 18(2):115–126, February 2017.
- 670 Jonathan D Rosenblatt, Livio Finos, Wouter D Weeda, Aldo Solari, and Jelle J Goeman. All-Resolutions inference for brain imaging. *Neuroimage*, 181:786–796, November 2018.
- William W Rozeboom. The fallacy of the null-hypothesis significance test. *Psychol. Bull.*, 57(5):416–428, 1960.
- Stephen M Smith, Christian F Beckmann, Jesper Andersson, Edward J Auerbach, Janine Bijsterbosch, Gwenaëlle Douaud, Eugene Duff, David A Feinberg, Ludovica Griffanti, Michael P Harms, Michael Kelly, Timothy Laumann,
- 675 Karla L Miller, Steen Moeller, Steve Petersen, Jonathan Power, Gholamreza Salimi-Khorshidi, Abraham Z Snyder, An T Vu, Mark W Woolrich, Junqian Xu, Essa Yacoub, Kamil Uğurbil, David C Van Essen, Matthew F Glasser, and WU-Minn HCP Consortium. Resting-state fMRI in the human connectome project. *Neuroimage*, 80:144–168, October 2013.
- Max Sommerfeld, Stephan Sain, and Armin Schwartzman. Confidence regions for spatial excursion sets from repeated
- 680 random field observations, with an application to climate. *J. Am. Stat. Assoc.*, 113(523):1327–1340, July 2018.
- F J E Telschow and A Schwartzman. Simultaneous confidence bands for functional data using the gaussian kinematic formula. *arXiv preprint arXiv:1901.06386*, 2019.
- K Uğurbil, B Müller-Bierl, and K Uğurbil. An integrative model for neuronal activity-induced signal changes for gradient and spin echo functional imaging, 2009.
- 685 Ronald L Wasserstein, Nicole A Lazar, and Others. The ASA’s statement on p-values: context, process, and purpose. *Am. Stat.*, 70(2):129–133, 2016.
- Anderson M Winkler, Gerard R Ridgway, Gwenaëlle Douaud, Thomas E Nichols, and Stephen M Smith. Faster permutation inference in brain imaging. *Neuroimage*, 141:502–516, November 2016.

690 Choong-Wan Woo, Anjali Krishnan, and Tor D Wager. Cluster-extent based thresholding in fMRI analyses: pitfalls and recommendations. *Neuroimage*, 91:412–419, May 2014.

## Appendix A. Supplementary Human Connectome Project Results

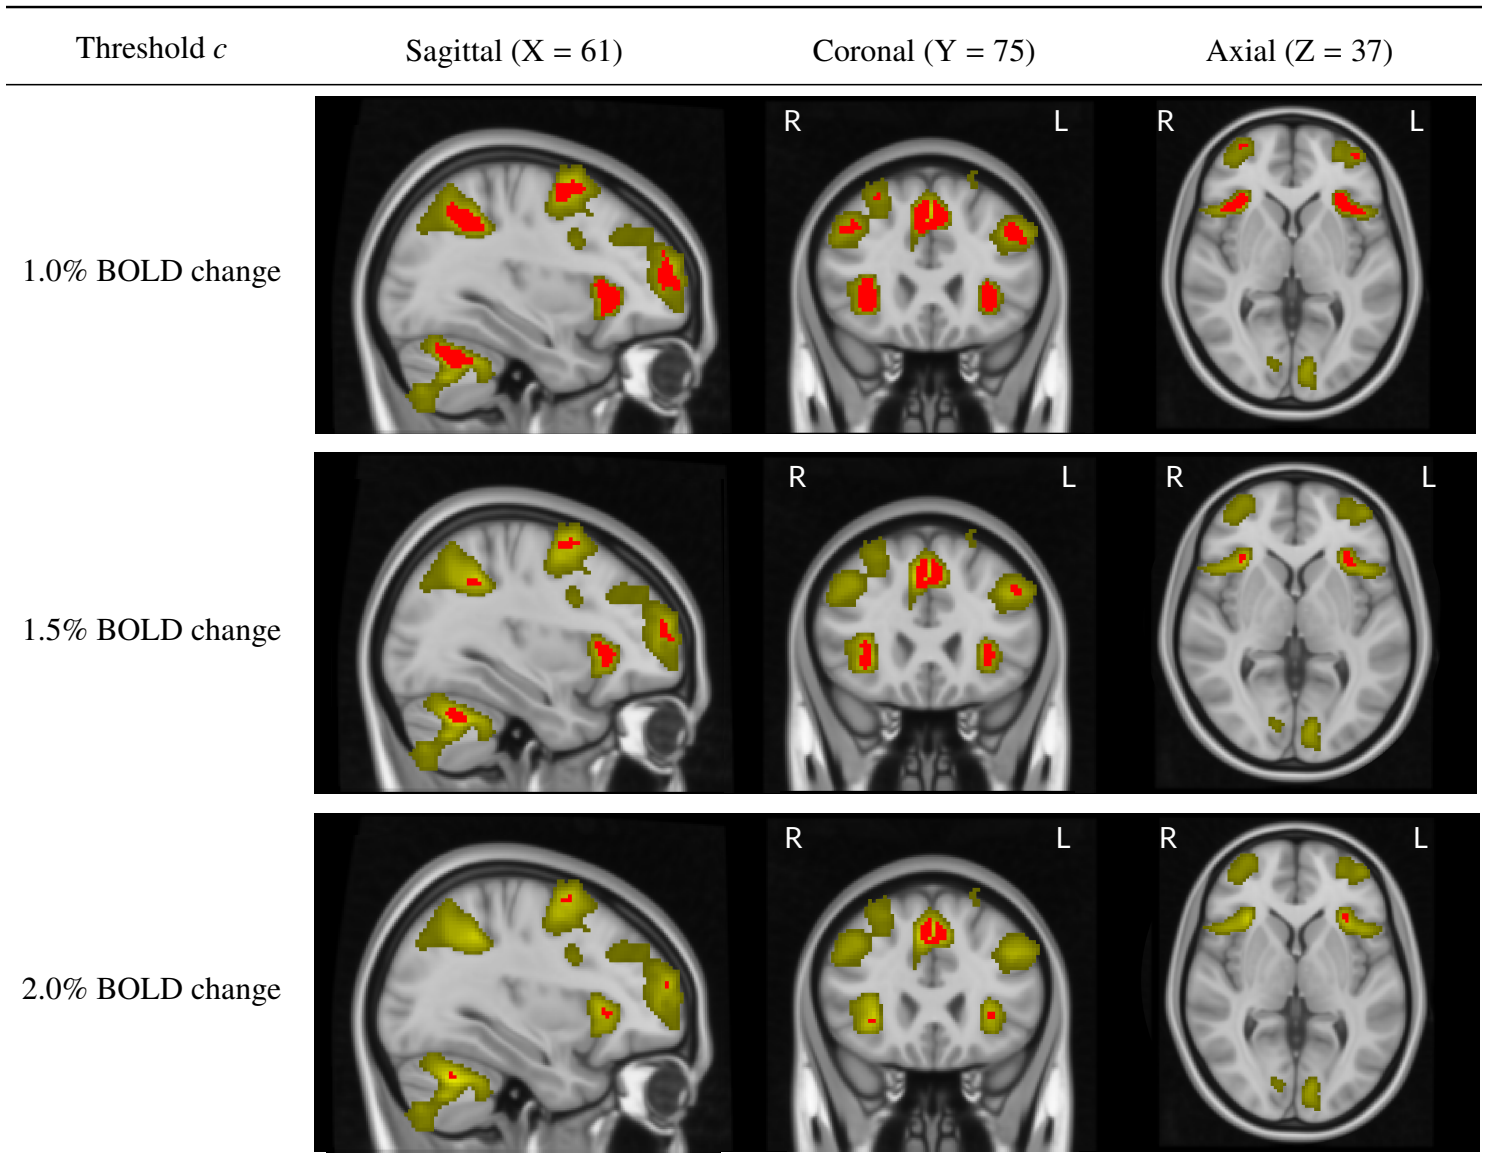

**Supplementary Figure 1:** Comparing the upper Confidence Sets for the HCP working memory task data (same slice views as **Fig. 9**) with the thresholded  $t$ -statistic results obtained by applying a traditional group-level one-sample  $t$ -test, voxelwise  $p < 0.05$  FWE correction (green-yellow voxels). While over 25,000 voxels were determined as statistically significant with the standard inference method, less than 5,000 voxels were asserted to have at least a 1.0% BOLD change by the CSs. In particular, the two statistically significant clusters spanning the left and right side of the frontal lobe contained almost no voxels with a practical effect size of over 1.5% BOLD change.

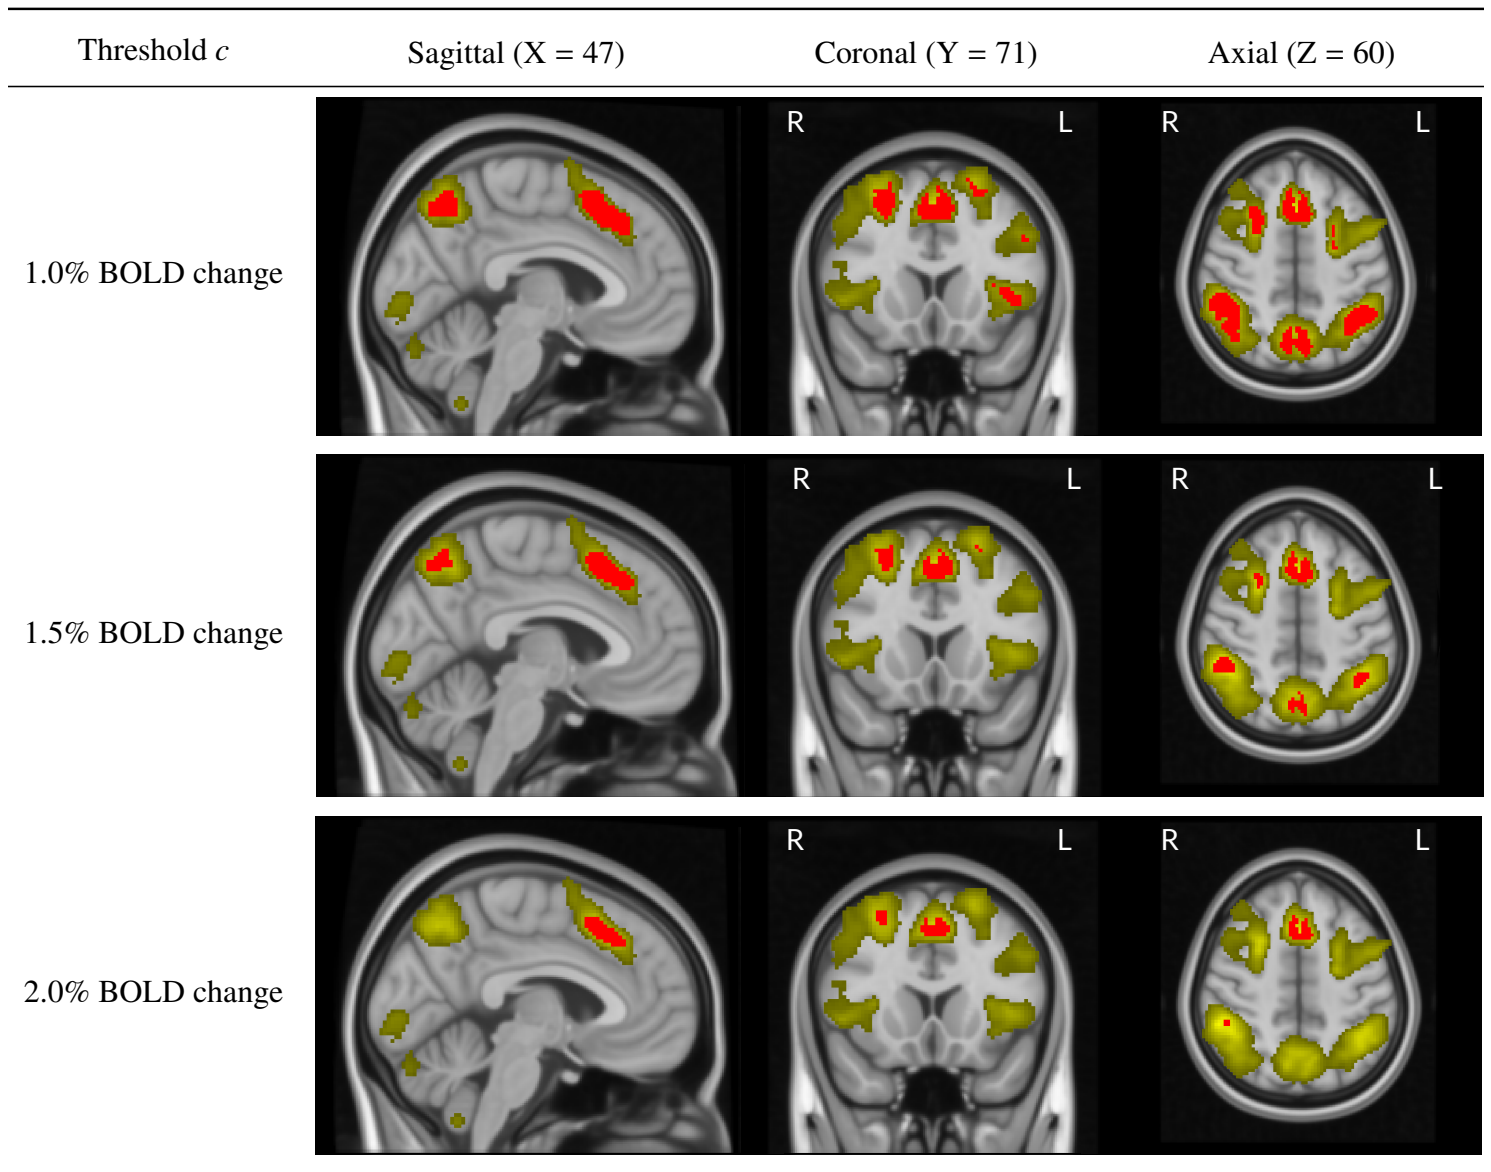

**Supplementary Figure 2:** Comparing the upper Confidence Sets for the HCP working memory task data (same slice views as **Fig. 10**) with the thresholded  $t$ -statistic results obtained by applying a traditional group-level one-sample  $t$ -test, voxelwise  $p < 0.05$  FWE correction (green-yellow voxels). While one large statistically significant cluster covers the supramarginal gyrus, angular gyrus and precuneus, the CSs localize the precise areas with practically significant effect sizes within each of these regions.

**Supplementary Table 1.** Empirical coverage results for the 2D simulations using nominal (nom.) coverage levels  $1 - \alpha = 80\%$ ,  $90\%$  and  $95\%$ . Results are shown for applying the Wild  $t$ -Bootstrap method to the residual field along the estimated boundary  $\partial\hat{\mathcal{A}}_c$  (top) and the true boundary  $\partial\mathcal{A}_c$  (bottom).

|                               | 2D Signal 1. (Ramp) |                    | 2D Signal 2. (Circle) |                    |
|-------------------------------|---------------------|--------------------|-----------------------|--------------------|
|                               | Standard Dev 1.     | Standard Dev 2.    | Standard Dev 1.       | Standard Dev 2.    |
| $\partial\hat{\mathcal{A}}_c$ |                     |                    |                       |                    |
| 80% nom.                      |                     |                    |                       |                    |
| $N = 60$                      | 90.13% $\pm$ 0.54%  | 87.57% $\pm$ 0.60% | 78.13% $\pm$ 0.75%    | 80.23% $\pm$ 0.73% |
| 120                           | 87.53% $\pm$ 0.60%  | 88.40% $\pm$ 0.58% | 80.53% $\pm$ 0.72%    | 78.70% $\pm$ 0.75% |
| 240                           | 87.43% $\pm$ 0.61%  | 87.33% $\pm$ 0.61% | 79.73% $\pm$ 0.73%    | 79.53% $\pm$ 0.74% |
| 480                           | 87.40% $\pm$ 0.61%  | 85.07% $\pm$ 0.65% | 78.50% $\pm$ 0.75%    | 77.40% $\pm$ 0.76% |
| 90% nom.                      |                     |                    |                       |                    |
| $N = 60$                      | 95.53% $\pm$ 0.38%  | 94.83% $\pm$ 0.40% | 88.90% $\pm$ 0.57%    | 89.90% $\pm$ 0.55% |
| 120                           | 94.07% $\pm$ 0.43%  | 93.73% $\pm$ 0.44% | 90.13% $\pm$ 0.54%    | 89.40% $\pm$ 0.56% |
| 240                           | 94.23% $\pm$ 0.43%  | 93.60% $\pm$ 0.45% | 89.17% $\pm$ 0.57%    | 90.17% $\pm$ 0.54% |
| 480                           | 93.50% $\pm$ 0.45%  | 93.33% $\pm$ 0.46% | 89.30% $\pm$ 0.56%    | 88.40% $\pm$ 0.58% |
| 95% nom.                      |                     |                    |                       |                    |
| $N = 60$                      | 97.67% $\pm$ 0.28%  | 97.33% $\pm$ 0.29% | 94.10% $\pm$ 0.43%    | 94.60% $\pm$ 0.41% |
| 120                           | 97.13% $\pm$ 0.30%  | 96.60% $\pm$ 0.33% | 94.40% $\pm$ 0.42%    | 94.37% $\pm$ 0.42% |
| 240                           | 97.30% $\pm$ 0.30%  | 97.07% $\pm$ 0.31% | 94.43% $\pm$ 0.42%    | 95.53% $\pm$ 0.38% |
| 480                           | 96.97% $\pm$ 0.31%  | 97.13% $\pm$ 0.30% | 94.80% $\pm$ 0.41%    | 93.73% $\pm$ 0.44% |
| $\partial\mathcal{A}_c$       |                     |                    |                       |                    |
| 80% nom.                      |                     |                    |                       |                    |
| $N = 60$                      | 60.27% $\pm$ 0.89%  | 57.30% $\pm$ 0.90% | 78.17% $\pm$ 0.75%    | 80.23% $\pm$ 0.73% |
| 120                           | 66.03% $\pm$ 0.86%  | 68.30% $\pm$ 0.85% | 80.53% $\pm$ 0.72%    | 78.67% $\pm$ 0.75% |
| 240                           | 71.10% $\pm$ 0.83%  | 72.23% $\pm$ 0.82% | 79.83% $\pm$ 0.73%    | 79.57% $\pm$ 0.74% |
| 480                           | 76.27% $\pm$ 0.78%  | 76.17% $\pm$ 0.78% | 78.57% $\pm$ 0.75%    | 77.40% $\pm$ 0.76% |
| 90% nom.                      |                     |                    |                       |                    |
| $N = 60$                      | 78.47% $\pm$ 0.75%  | 76.60% $\pm$ 0.77% | 88.97% $\pm$ 0.57%    | 90.00% $\pm$ 0.55% |
| 120                           | 81.67% $\pm$ 0.71%  | 83.40% $\pm$ 0.68% | 90.20% $\pm$ 0.54%    | 89.43% $\pm$ 0.56% |
| 240                           | 85.20% $\pm$ 0.65%  | 85.83% $\pm$ 0.64% | 89.17% $\pm$ 0.57%    | 90.17% $\pm$ 0.54% |
| 480                           | 88.50% $\pm$ 0.58%  | 87.23% $\pm$ 0.61% | 89.27% $\pm$ 0.57%    | 88.43% $\pm$ 0.58% |
| 95% nom.                      |                     |                    |                       |                    |
| $N = 60$                      | 88.97% $\pm$ 0.57%  | 87.27% $\pm$ 0.61% | 94.17% $\pm$ 0.43%    | 94.57% $\pm$ 0.41% |
| 120                           | 89.87% $\pm$ 0.55%  | 90.67% $\pm$ 0.53% | 94.47% $\pm$ 0.42%    | 94.30% $\pm$ 0.42% |
| 240                           | 92.07% $\pm$ 0.49%  | 92.47% $\pm$ 0.48% | 94.40% $\pm$ 0.42%    | 95.50% $\pm$ 0.39% |
| 480                           | 94.23% $\pm$ 0.43%  | 94.10% $\pm$ 0.43% | 94.87% $\pm$ 0.40%    | 93.73% $\pm$ 0.44% |

**Supplementary Table 2.** Empirical coverage results for the 3D simulations using nominal (nom.) coverage levels  $1 - \alpha = 80\%$ ,  $90\%$  and  $95\%$ . Results are shown for applying the Wild  $t$ -Bootstrap method to the residual field along the estimated boundary  $\partial\hat{\mathcal{A}}_c$  (top) and the true boundary  $\partial\mathcal{A}_c$  (bottom).

|                               | 3D Signal 1. (Small Sphere) |                    | 3D Signal 2. (Large Sphere) |                    |
|-------------------------------|-----------------------------|--------------------|-----------------------------|--------------------|
|                               | Standard Dev 1.             | Standard Dev 2.    | Standard Dev 1.             | Standard Dev 2.    |
| $\partial\hat{\mathcal{A}}_c$ |                             |                    |                             |                    |
| 80% nom.                      |                             |                    |                             |                    |
| $N = 60$                      | 83.40% $\pm$ 0.68%          | 83.77% $\pm$ 0.67% | 85.10% $\pm$ 0.65%          | 85.73% $\pm$ 0.64% |
| 120                           | 83.67% $\pm$ 0.67%          | 84.03% $\pm$ 0.67% | 85.87% $\pm$ 0.64%          | 85.23% $\pm$ 0.65% |
| 240                           | 84.03% $\pm$ 0.67%          | 83.77% $\pm$ 0.67% | 85.23% $\pm$ 0.65%          | 85.40% $\pm$ 0.64% |
| 480                           | 85.03% $\pm$ 0.65%          | 82.20% $\pm$ 0.70% | 87.67% $\pm$ 0.60%          | 85.30% $\pm$ 0.65% |
| 90% nom.                      |                             |                    |                             |                    |
| $N = 60$                      | 92.30% $\pm$ 0.49%          | 92.87% $\pm$ 0.47% | 92.40% $\pm$ 0.48%          | 93.47% $\pm$ 0.45% |
| 120                           | 92.07% $\pm$ 0.49%          | 91.27% $\pm$ 0.52% | 93.00% $\pm$ 0.47%          | 93.50% $\pm$ 0.45% |
| 240                           | 92.33% $\pm$ 0.49%          | 92.87% $\pm$ 0.47% | 93.30% $\pm$ 0.46%          | 92.90% $\pm$ 0.47% |
| 480                           | 93.03% $\pm$ 0.46%          | 91.53% $\pm$ 0.51% | 93.50% $\pm$ 0.45%          | 93.47% $\pm$ 0.45% |
| 95% nom.                      |                             |                    |                             |                    |
| $N = 60$                      | 96.87% $\pm$ 0.32%          | 96.83% $\pm$ 0.32% | 96.40% $\pm$ 0.34%          | 96.70% $\pm$ 0.33% |
| 120                           | 96.07% $\pm$ 0.35%          | 95.60% $\pm$ 0.37% | 96.97% $\pm$ 0.31%          | 97.10% $\pm$ 0.31% |
| 240                           | 96.20% $\pm$ 0.35%          | 96.83% $\pm$ 0.32% | 96.23% $\pm$ 0.35%          | 96.90% $\pm$ 0.32% |
| 480                           | 96.30% $\pm$ 0.34%          | 96.13% $\pm$ 0.35% | 96.83% $\pm$ 0.32%          | 93.80% $\pm$ 0.44% |
| $\partial\mathcal{A}_c$       |                             |                    |                             |                    |
| 80% nom.                      |                             |                    |                             |                    |
| $N = 60$                      | 83.60% $\pm$ 0.68%          | 83.90% $\pm$ 0.67% | 85.20% $\pm$ 0.65%          | 85.80% $\pm$ 0.64% |
| 120                           | 83.80% $\pm$ 0.67%          | 83.93% $\pm$ 0.67% | 85.90% $\pm$ 0.64%          | 85.23% $\pm$ 0.65% |
| 240                           | 84.03% $\pm$ 0.67%          | 83.90% $\pm$ 0.67% | 85.27% $\pm$ 0.65%          | 85.40% $\pm$ 0.64% |
| 480                           | 85.03% $\pm$ 0.65%          | 82.27% $\pm$ 0.70% | 87.73% $\pm$ 0.60%          | 85.37% $\pm$ 0.65% |
| 90% nom.                      |                             |                    |                             |                    |
| $N = 60$                      | 92.43% $\pm$ 0.48%          | 92.90% $\pm$ 0.47% | 92.37% $\pm$ 0.48%          | 93.40% $\pm$ 0.45% |
| 120                           | 91.97% $\pm$ 0.50%          | 91.43% $\pm$ 0.51% | 92.97% $\pm$ 0.47%          | 93.60% $\pm$ 0.45% |
| 240                           | 92.37% $\pm$ 0.48%          | 92.90% $\pm$ 0.47% | 93.33% $\pm$ 0.46%          | 92.90% $\pm$ 0.47% |
| 480                           | 93.03% $\pm$ 0.46%          | 91.40% $\pm$ 0.51% | 93.57% $\pm$ 0.45%          | 93.47% $\pm$ 0.45% |
| 95% nom.                      |                             |                    |                             |                    |
| $N = 60$                      | 96.87% $\pm$ 0.32%          | 96.93% $\pm$ 0.31% | 96.37% $\pm$ 0.34%          | 96.70% $\pm$ 0.33% |
| 120                           | 96.07% $\pm$ 0.35%          | 95.53% $\pm$ 0.38% | 96.97% $\pm$ 0.31%          | 97.13% $\pm$ 0.30% |
| 240                           | 96.17% $\pm$ 0.35%          | 96.93% $\pm$ 0.31% | 96.23% $\pm$ 0.35%          | 96.80% $\pm$ 0.32% |
| 480                           | 96.33% $\pm$ 0.34%          | 96.13% $\pm$ 0.35% | 96.77% $\pm$ 0.32%          | 96.80% $\pm$ 0.32% |

**Supplementary Table 2. (continued)**

|                                | <b>3D Signal 3. (Multiple Spheres)</b> |                        | <b>3D Signal 4. (UK Biobank)</b> |
|--------------------------------|----------------------------------------|------------------------|----------------------------------|
|                                | <b>Standard Dev 1.</b>                 | <b>Standard Dev 2.</b> | <b>UK Biobank SD</b>             |
| $\partial \hat{\mathcal{A}}_c$ |                                        |                        |                                  |
| 80% nom.                       |                                        |                        |                                  |
| $N = 60$                       | 89.47% $\pm$ 0.56%                     | 89.20% $\pm$ 0.57%     | 89.17% $\pm$ 0.57%               |
| 120                            | 87.60% $\pm$ 0.60%                     | 88.17% $\pm$ 0.59%     | 87.17% $\pm$ 0.61%               |
| 240                            | 86.17% $\pm$ 0.63%                     | 86.33% $\pm$ 0.63%     | 86.27% $\pm$ 0.63%               |
| 480                            | 86.13% $\pm$ 0.63%                     | 86.10% $\pm$ 0.63%     | 87.67% $\pm$ 0.60%               |
| 90% nom.                       |                                        |                        |                                  |
| $N = 60$                       | 95.20% $\pm$ 0.39%                     | 94.87% $\pm$ 0.40%     | 95.23% $\pm$ 0.39%               |
| 120                            | 94.53% $\pm$ 0.42%                     | 93.97% $\pm$ 0.43%     | 94.63% $\pm$ 0.41%               |
| 240                            | 93.67% $\pm$ 0.44%                     | 93.17% $\pm$ 0.46%     | 93.73% $\pm$ 0.44%               |
| 480                            | 93.97% $\pm$ 0.43%                     | 93.87% $\pm$ 0.44%     | 93.50% $\pm$ 0.45%               |
| 95% nom.                       |                                        |                        |                                  |
| $N = 60$                       | 97.93% $\pm$ 0.26%                     | 97.73% $\pm$ 0.27%     | 97.37% $\pm$ 0.29%               |
| 120                            | 97.37% $\pm$ 0.29%                     | 97.47% $\pm$ 0.29%     | 97.73% $\pm$ 0.27%               |
| 240                            | 97.23% $\pm$ 0.30%                     | 96.50% $\pm$ 0.34%     | 96.93% $\pm$ 0.31%               |
| 480                            | 97.23% $\pm$ 0.30%                     | 97.63% $\pm$ 0.28%     | 96.83% $\pm$ 0.32%               |
| $\partial \mathcal{A}_c$       |                                        |                        |                                  |
| 80% nom.                       |                                        |                        |                                  |
| $N = 60$                       | 84.30% $\pm$ 0.66%                     | 85.33% $\pm$ 0.65%     | 83.30% $\pm$ 0.68%               |
| 120                            | 84.93% $\pm$ 0.65%                     | 86.20% $\pm$ 0.63%     | 85.13% $\pm$ 0.65%               |
| 240                            | 85.73% $\pm$ 0.64%                     | 85.60% $\pm$ 0.64%     | 84.97% $\pm$ 0.65%               |
| 480                            | 86.03% $\pm$ 0.63%                     | 85.97% $\pm$ 0.63%     | 87.73% $\pm$ 0.60%               |
| 90% nom.                       |                                        |                        |                                  |
| $N = 60$                       | 92.93% $\pm$ 0.47%                     | 92.20% $\pm$ 0.49%     | 92.77% $\pm$ 0.47%               |
| 120                            | 93.20% $\pm$ 0.46%                     | 93.27% $\pm$ 0.46%     | 93.50% $\pm$ 0.45%               |
| 240                            | 93.37% $\pm$ 0.45%                     | 93.07% $\pm$ 0.46%     | 92.67% $\pm$ 0.48%               |
| 480                            | 93.97% $\pm$ 0.43%                     | 93.80% $\pm$ 0.44%     | 93.57% $\pm$ 0.45%               |
| 95% nom.                       |                                        |                        |                                  |
| $N = 60$                       | 96.80% $\pm$ 0.32%                     | 96.50% $\pm$ 0.34%     | 96.70% $\pm$ 0.33%               |
| 120                            | 96.90% $\pm$ 0.32%                     | 96.83% $\pm$ 0.32%     | 97.07% $\pm$ 0.31%               |
| 240                            | 97.20% $\pm$ 0.30%                     | 96.30% $\pm$ 0.34%     | 96.40% $\pm$ 0.34%               |
| 480                            | 97.27% $\pm$ 0.30%                     | 97.63% $\pm$ 0.28%     | 96.77% $\pm$ 0.32%               |
